# Supplementary material for: Biocatalytic Insights for The Synthesis of New Potential Prodrugs: Design of two Ibuprofen Derivatives
Source: MDPI journal article supplement (doi:10.3390/app13179852), 2023-08-31
Supplement: s1 [file s1]

## Supplementary Materials

*Article*

# Biocatalytic Insights for The Synthesis of New Prodrugs: Design of two Ibuprofen Derivatives

Federico Zappaterra, Francesco Presini, Valentina Venturi, Lindomar Alberto Lerin, Pier Paolo Giovannini and Stefania Costa

PROTON\_01FZ69\_mono

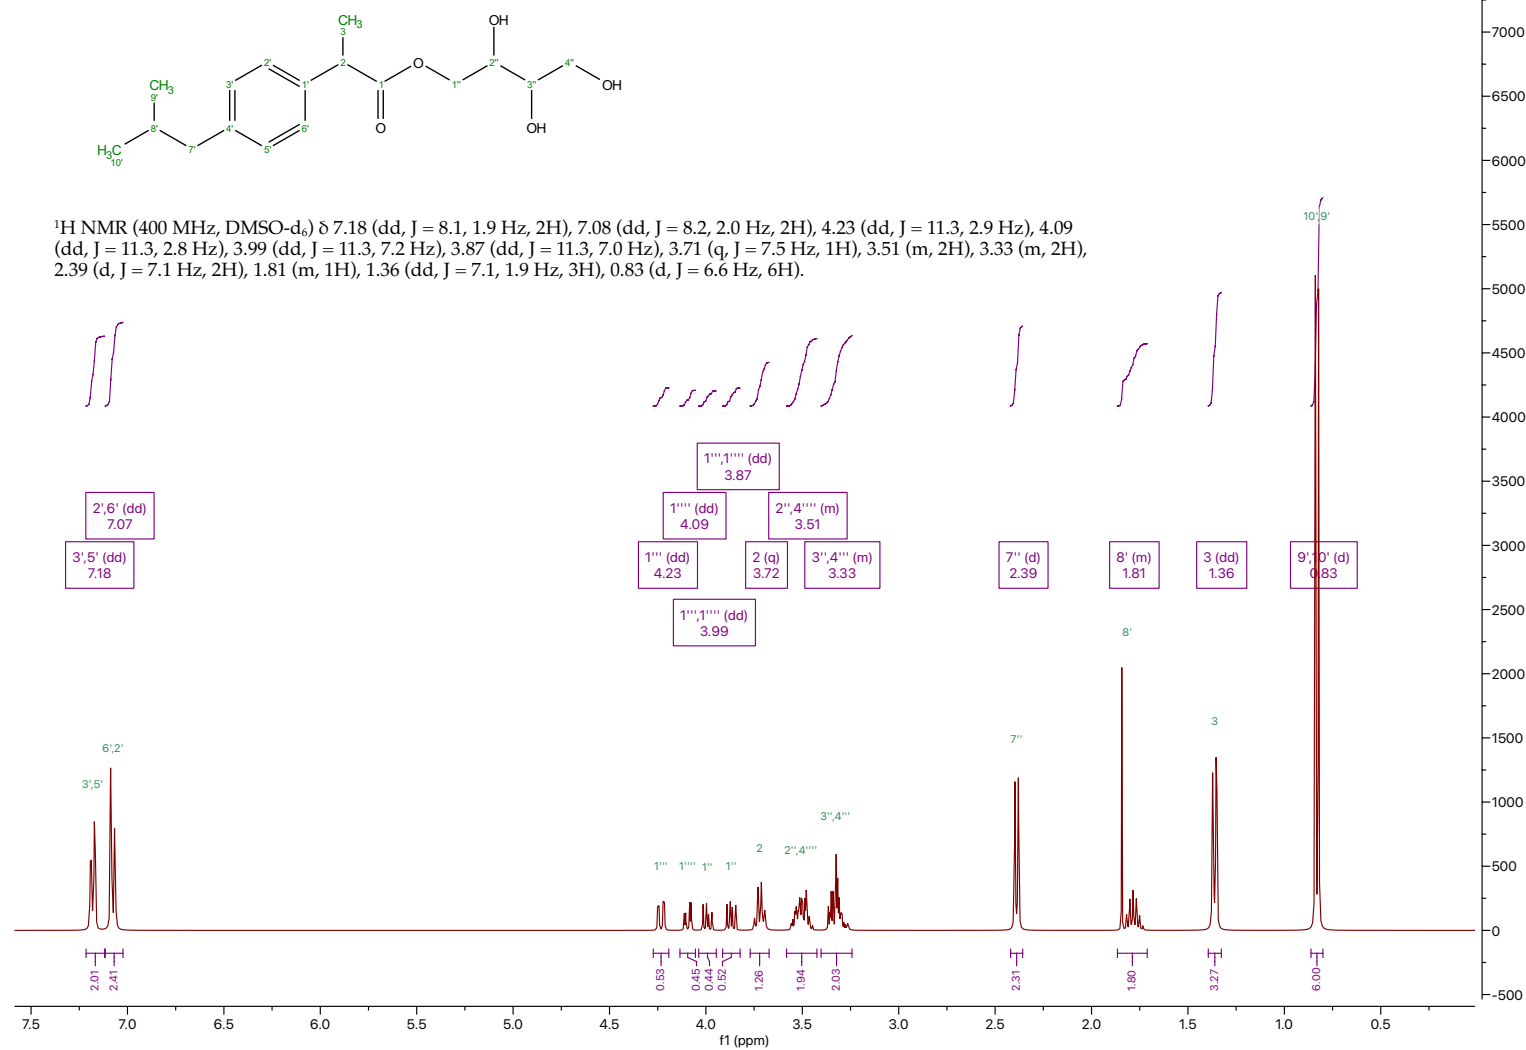

**Figure S1:** <sup>1</sup>H-NMR of erythritol ester of ibuprofen (**3a/3b**).

CARBON\_01FZ69\_mono

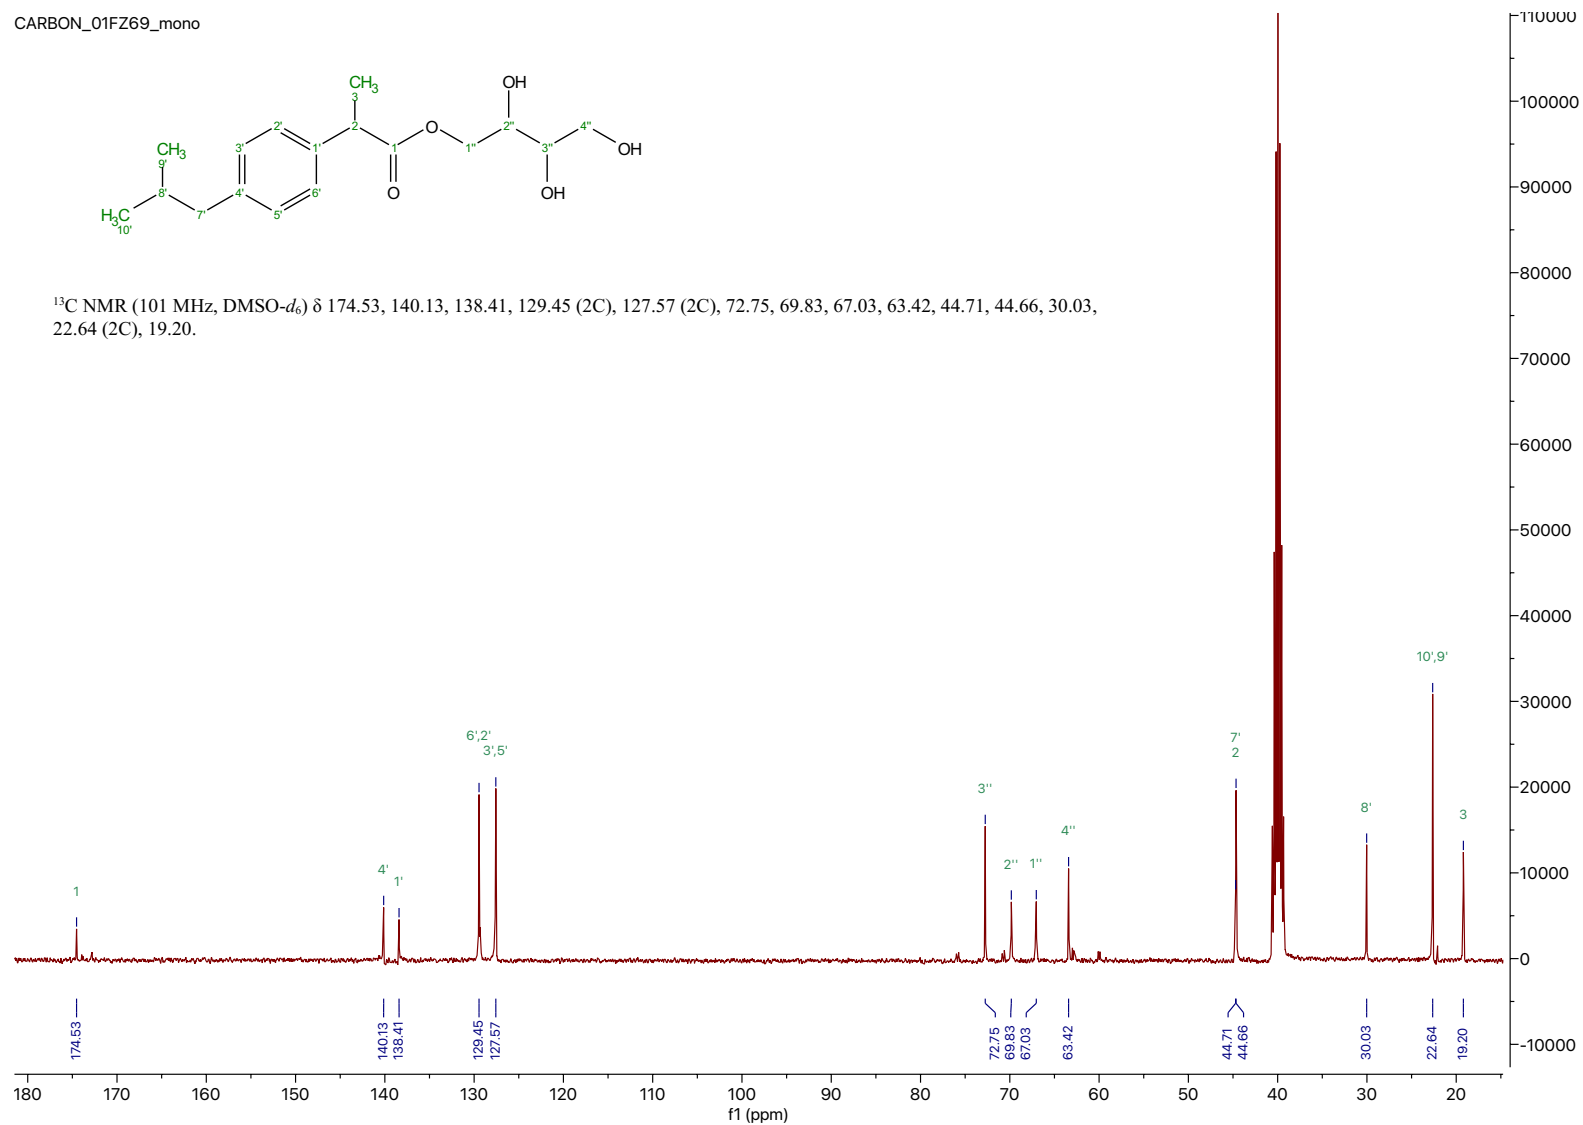

**Figure S2:** <sup>13</sup>C-NMR of erythritol ester of ibuprofen (**3a/3b**).

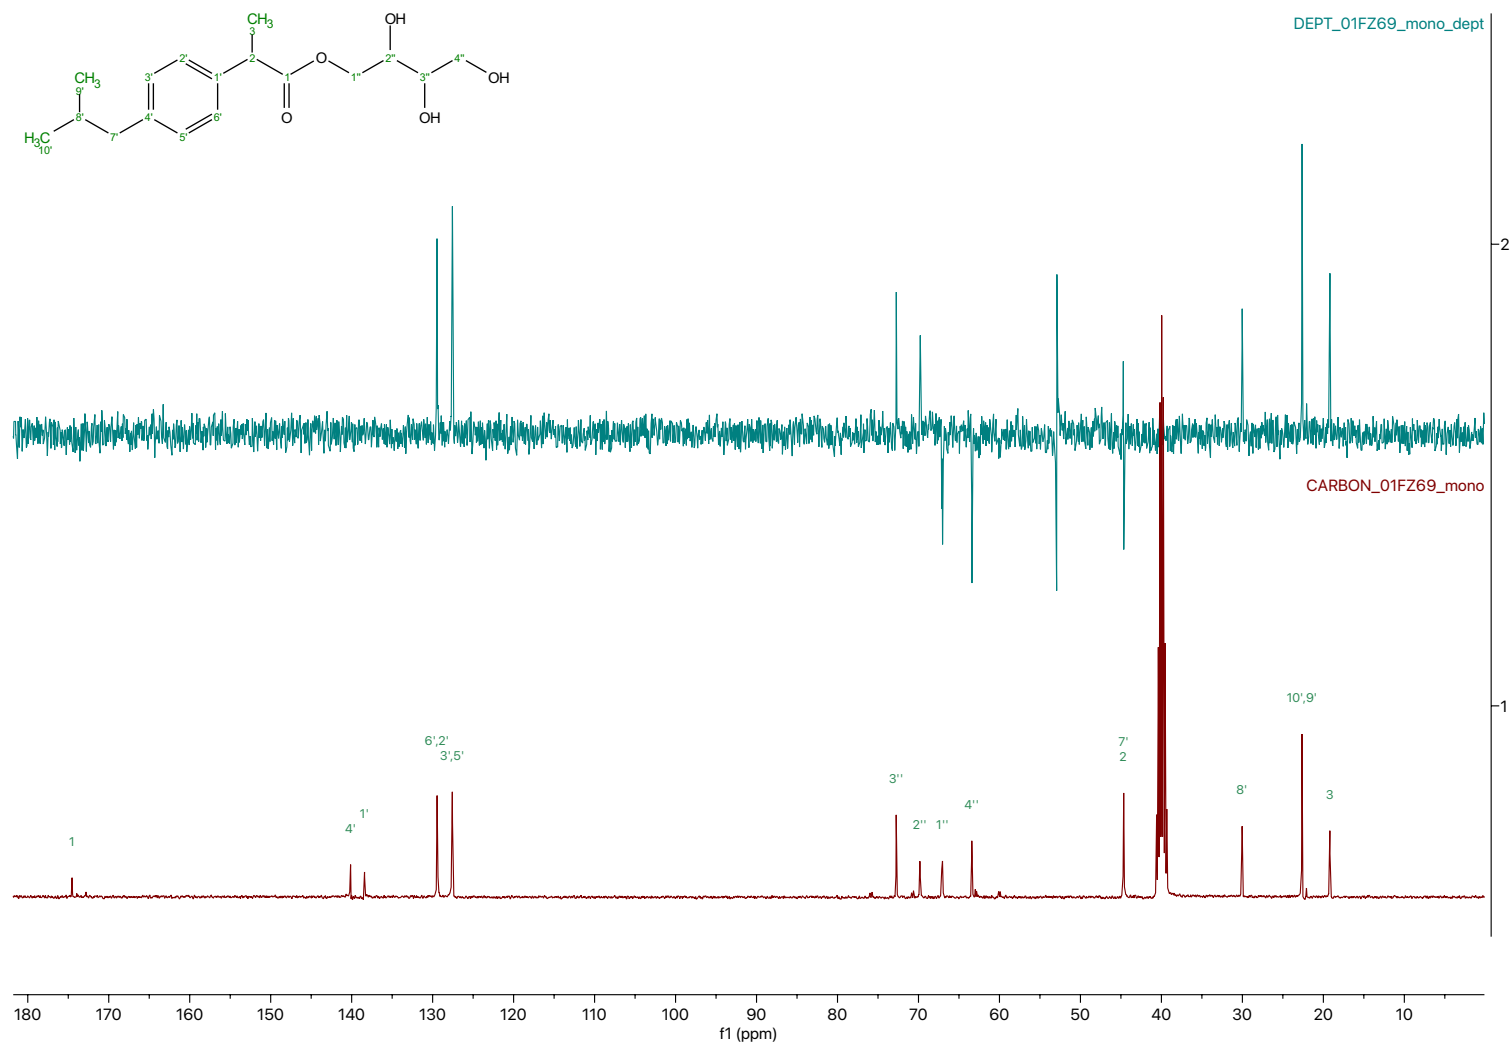

**Figure S3:** DEPT-NMR of erythritol ester of ibuprofen (3a/3b).

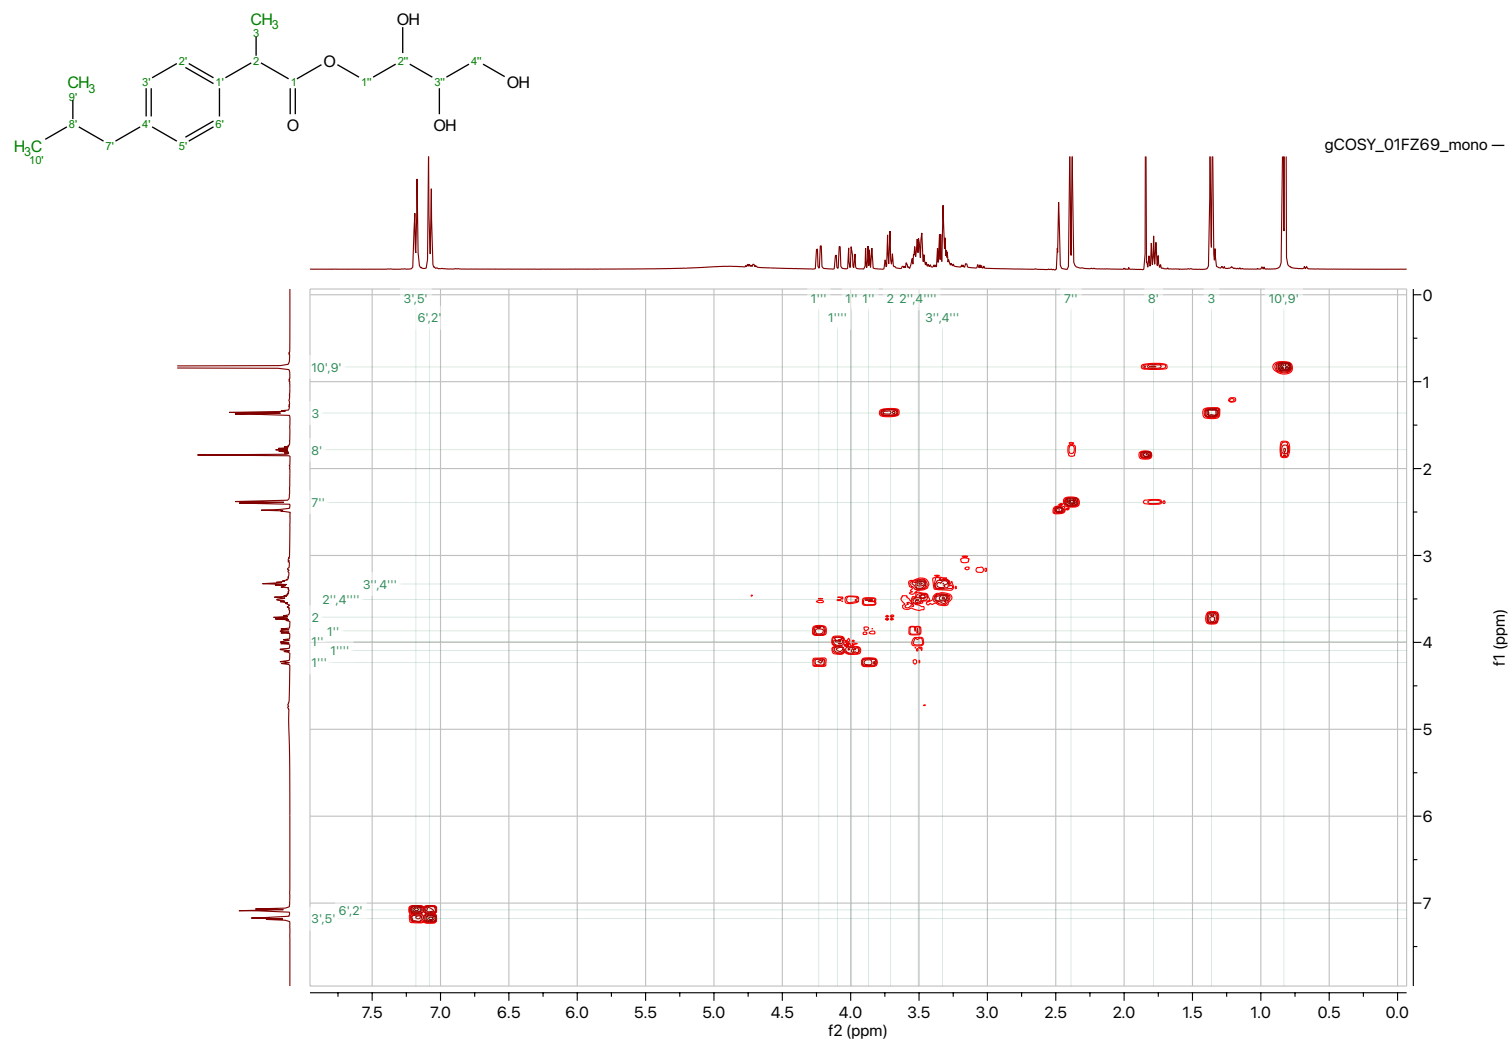

**Figure S4:** COSY-NMR of erythritol ester of ibuprofen (3a/3b).

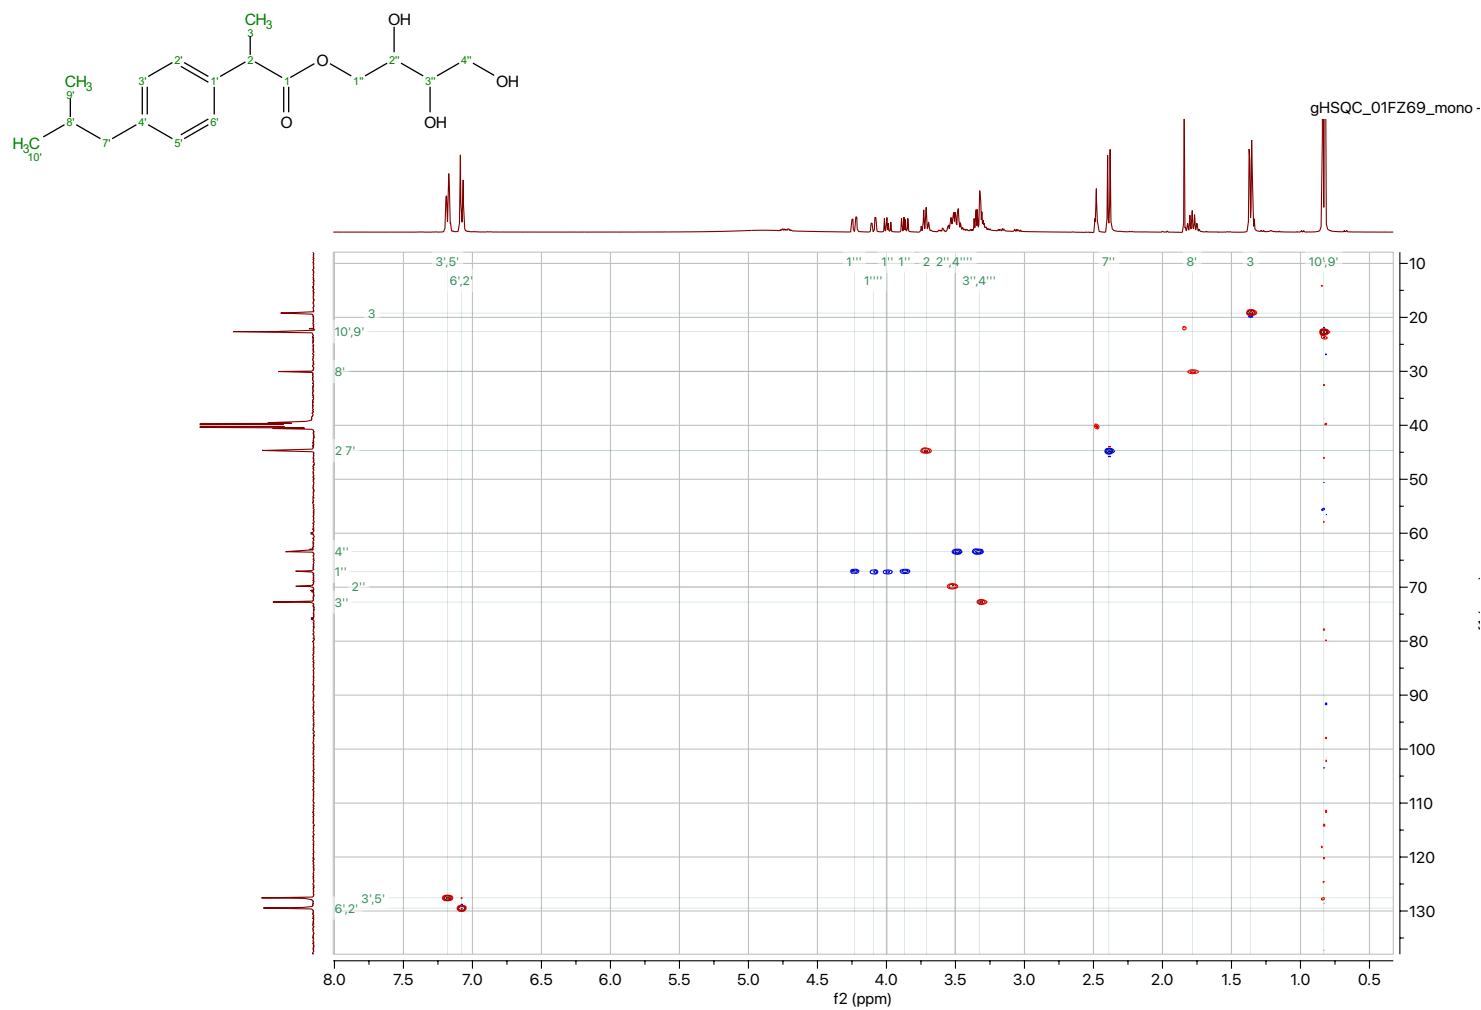

**Figure S5:** HSQC-NMR of erythritol ester of ibuprofen (3a/3b).

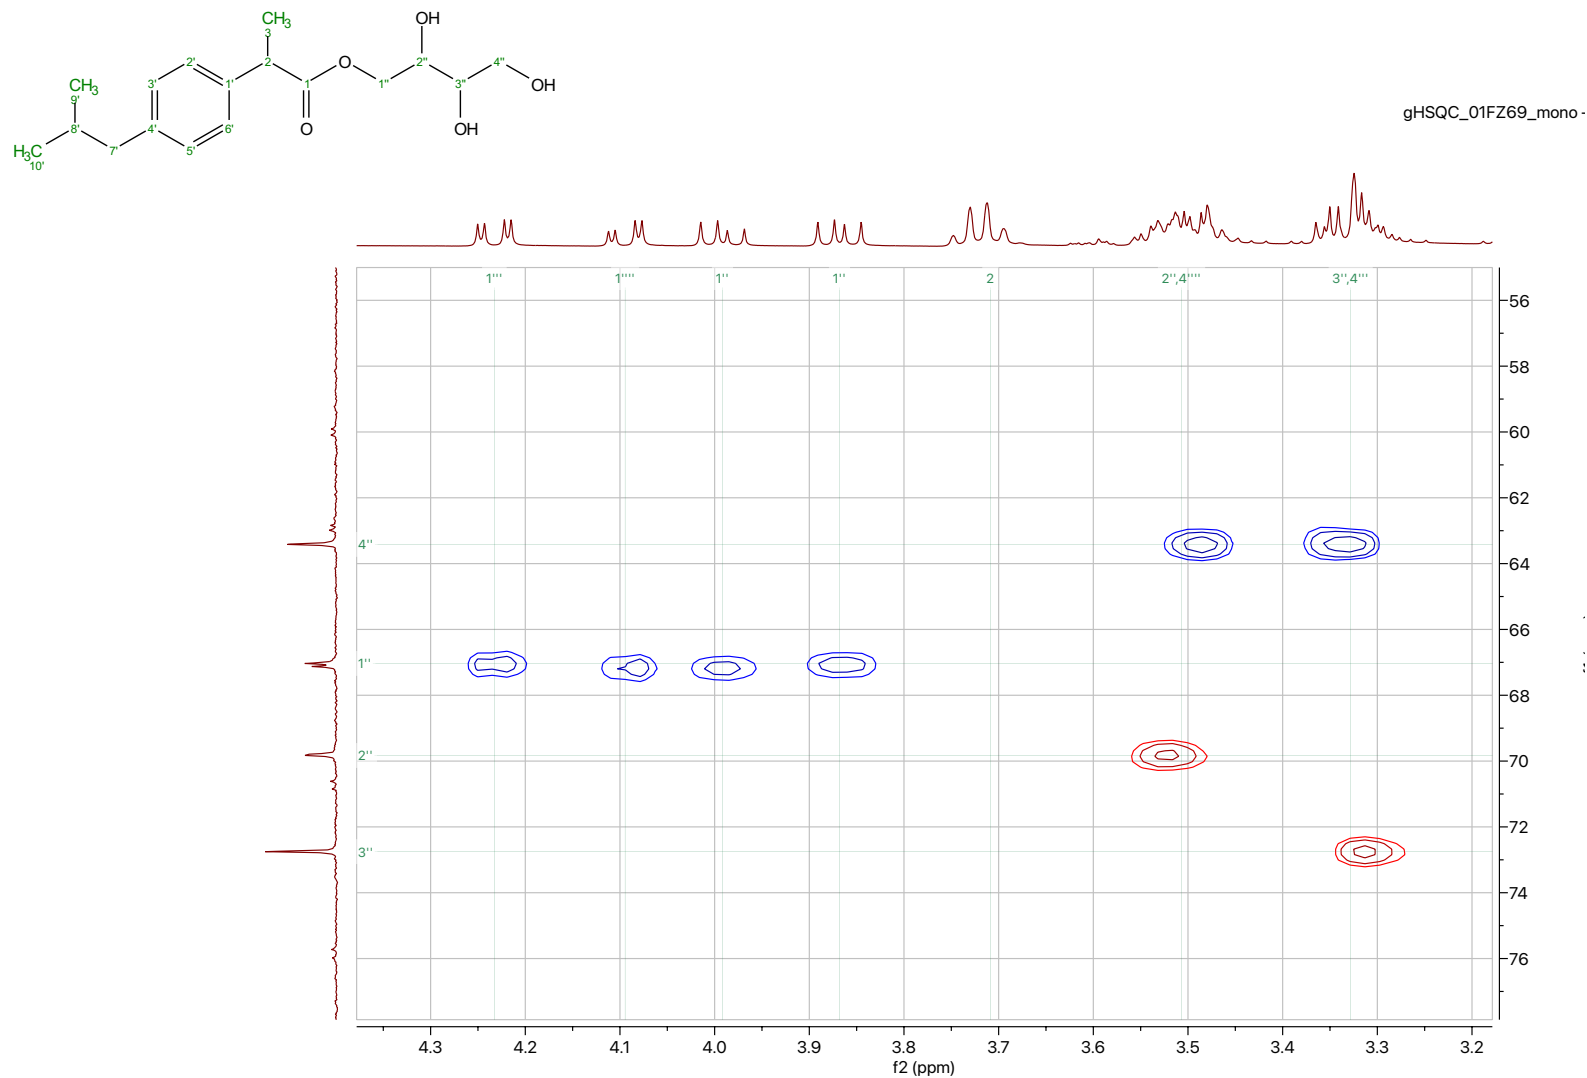

**Figure S6:** Zoom of the HSQC-NMR of erythritol ester of ibuprofen (3a/3b).

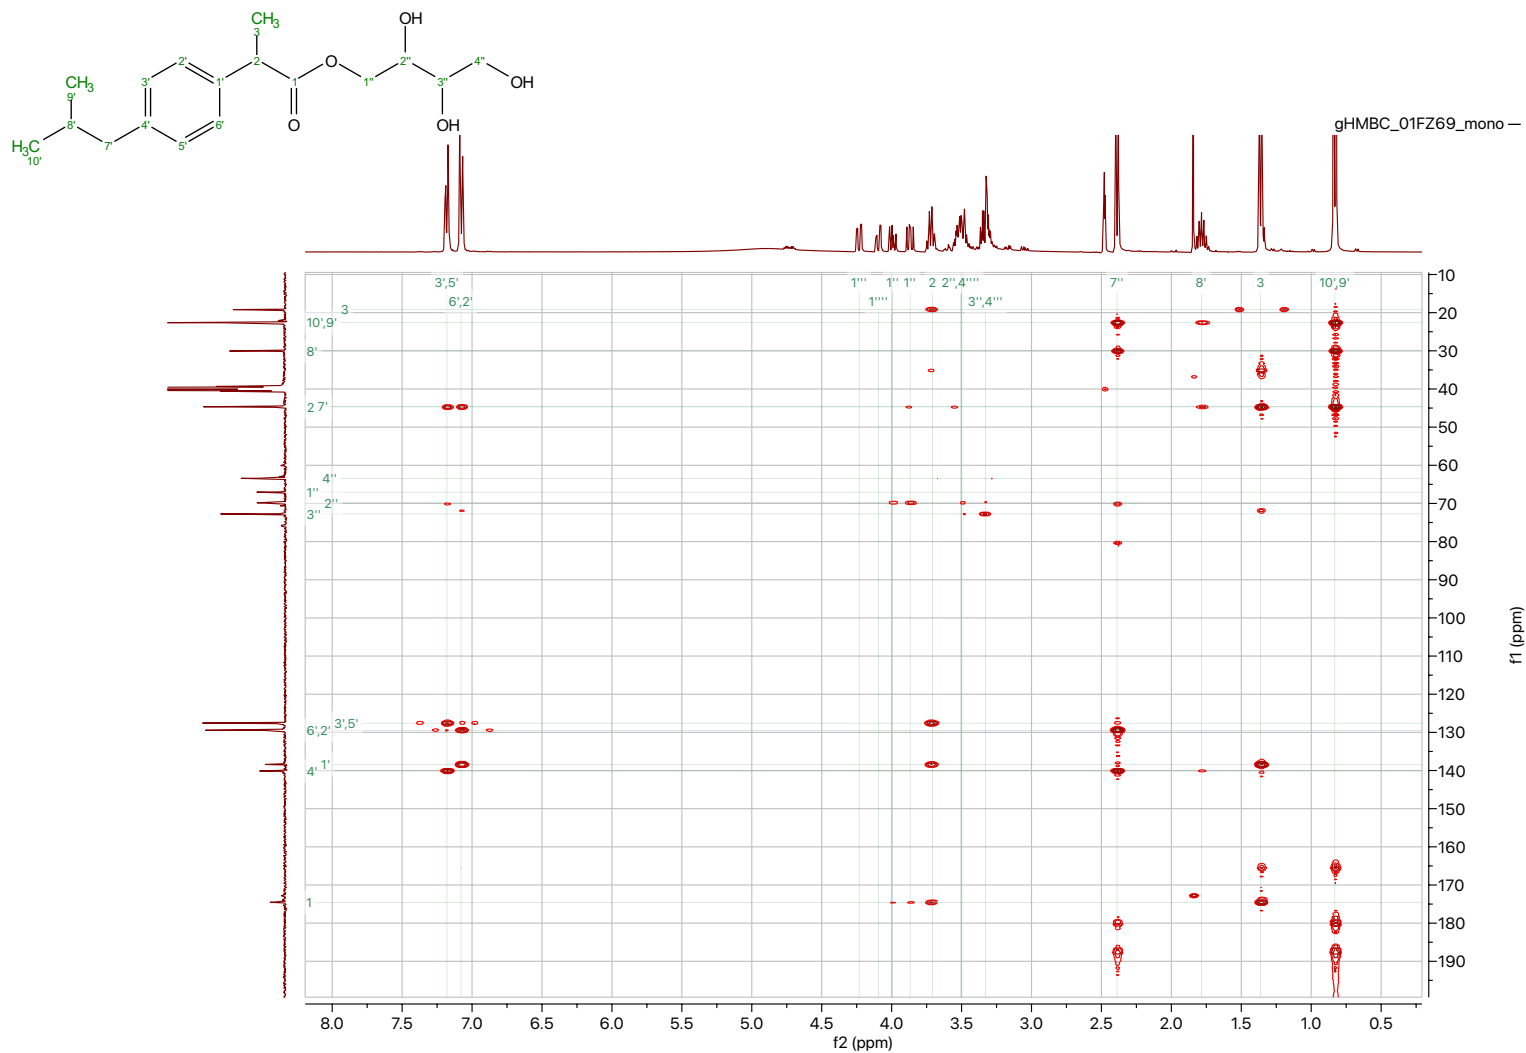

**Figure S7:** HMBC-NMR of erythritol ester of ibuprofen (3a/3b).



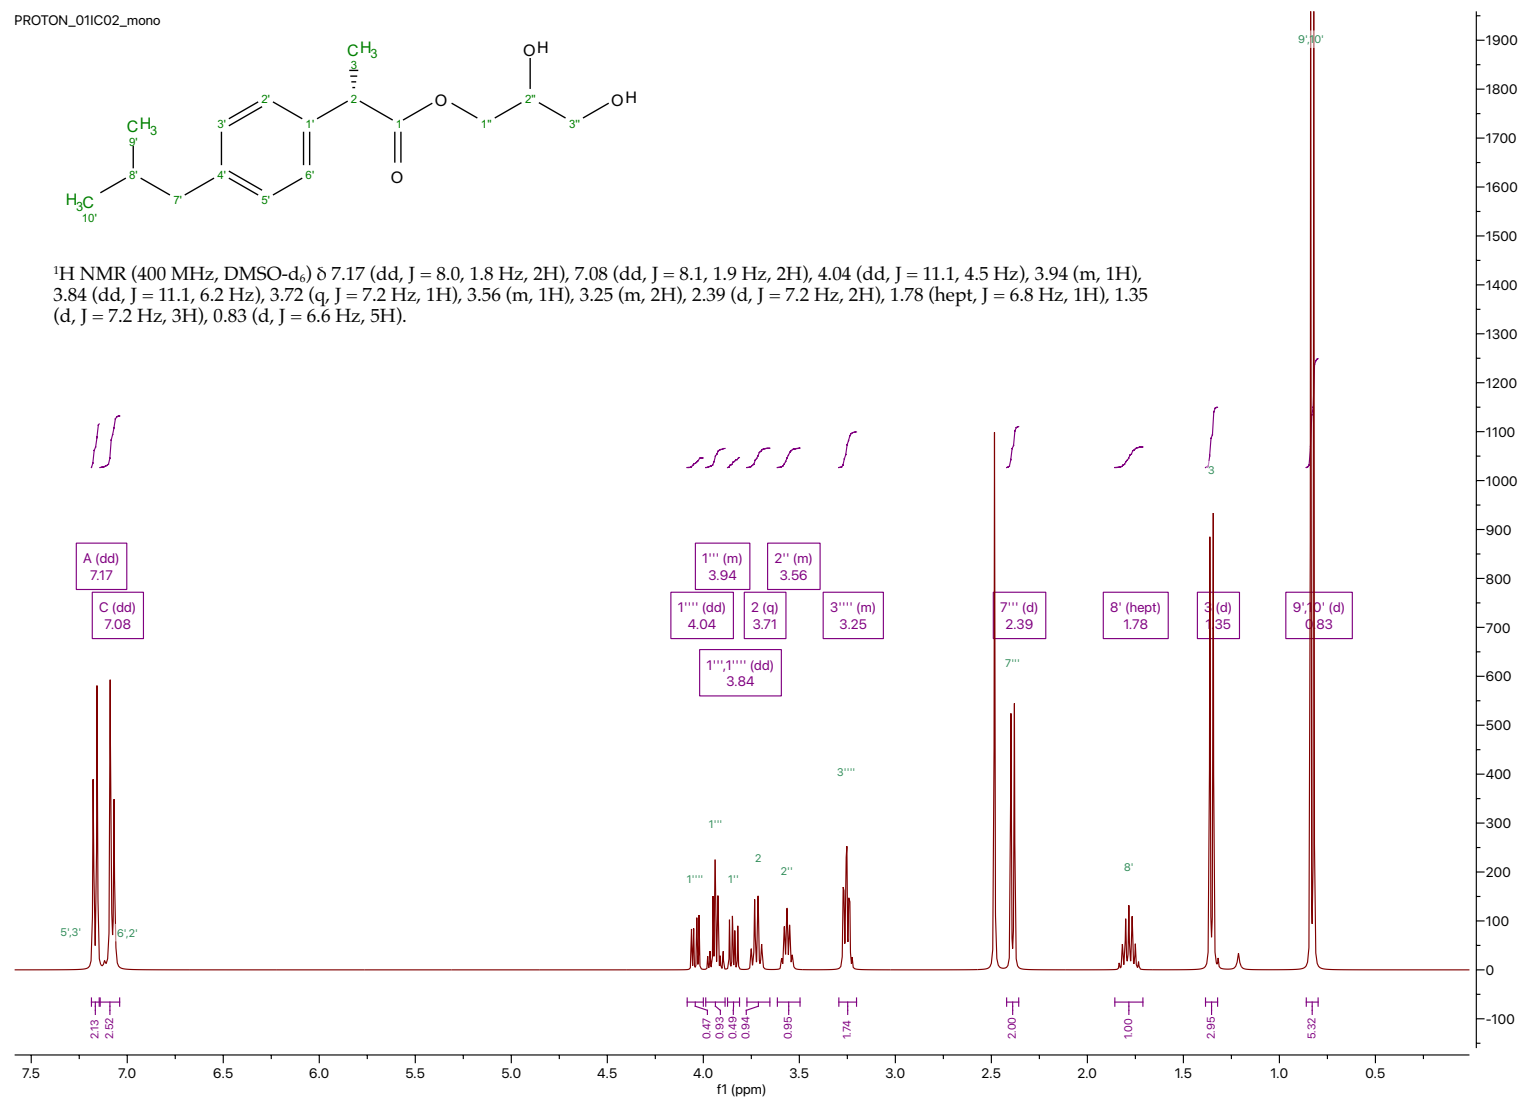

**Figure S8:** <sup>1</sup>H-NMR of glycerol ester of ibuprofen (**6a/6b**).

PROTON\_01IC02\_mono

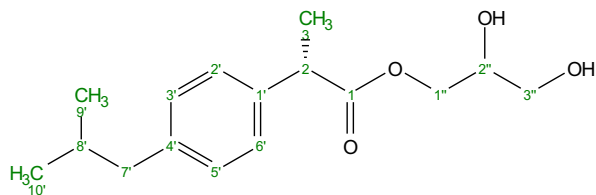

$^1\text{H}$  NMR (400 MHz,  $\text{DMSO}-d_6$ )  $\delta$  7.17 (d, 2H), 7.08 (d, 2H), 4.04 – 3.84 (dd,  $J = 11.1, 4.5$  Hz; m; dd,  $J = 11.1, 6.2$  Hz, 3H) 3.72 (q,  $J = 7.2$  Hz, 1H), 3.56 (p,  $J = 5.6$  Hz, 1H), 3.29 – 3.20 (m, 2H), 2.39 (d,  $J = 7.2$  Hz, 2H), 1.78 (hept,  $J = 6.8$  Hz, 1H), 1.35 (d,  $J = 7.2$  Hz, 3H), 0.83 (d,  $J = 6.6$  Hz, 5H).

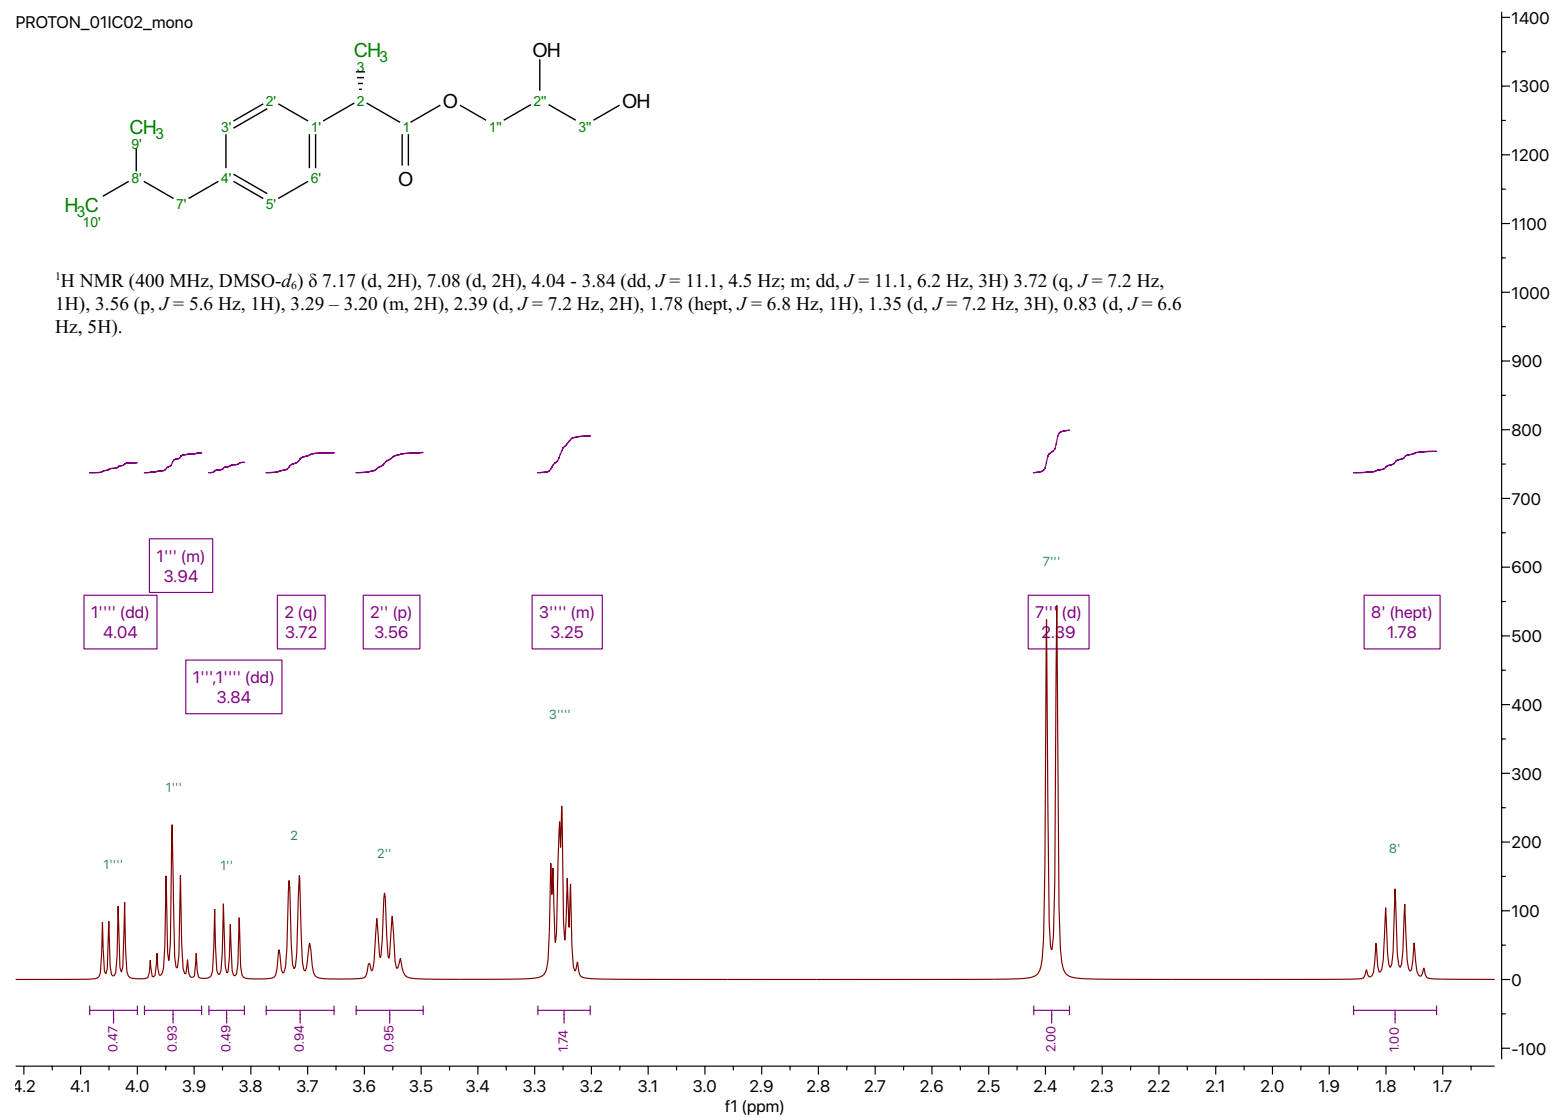

**Figure S9:** Zoom of the  $^1\text{H}$ -NMR of glycerol ester of ibuprofen (**6a/6b**).

CARBON\_01IC02\_mono

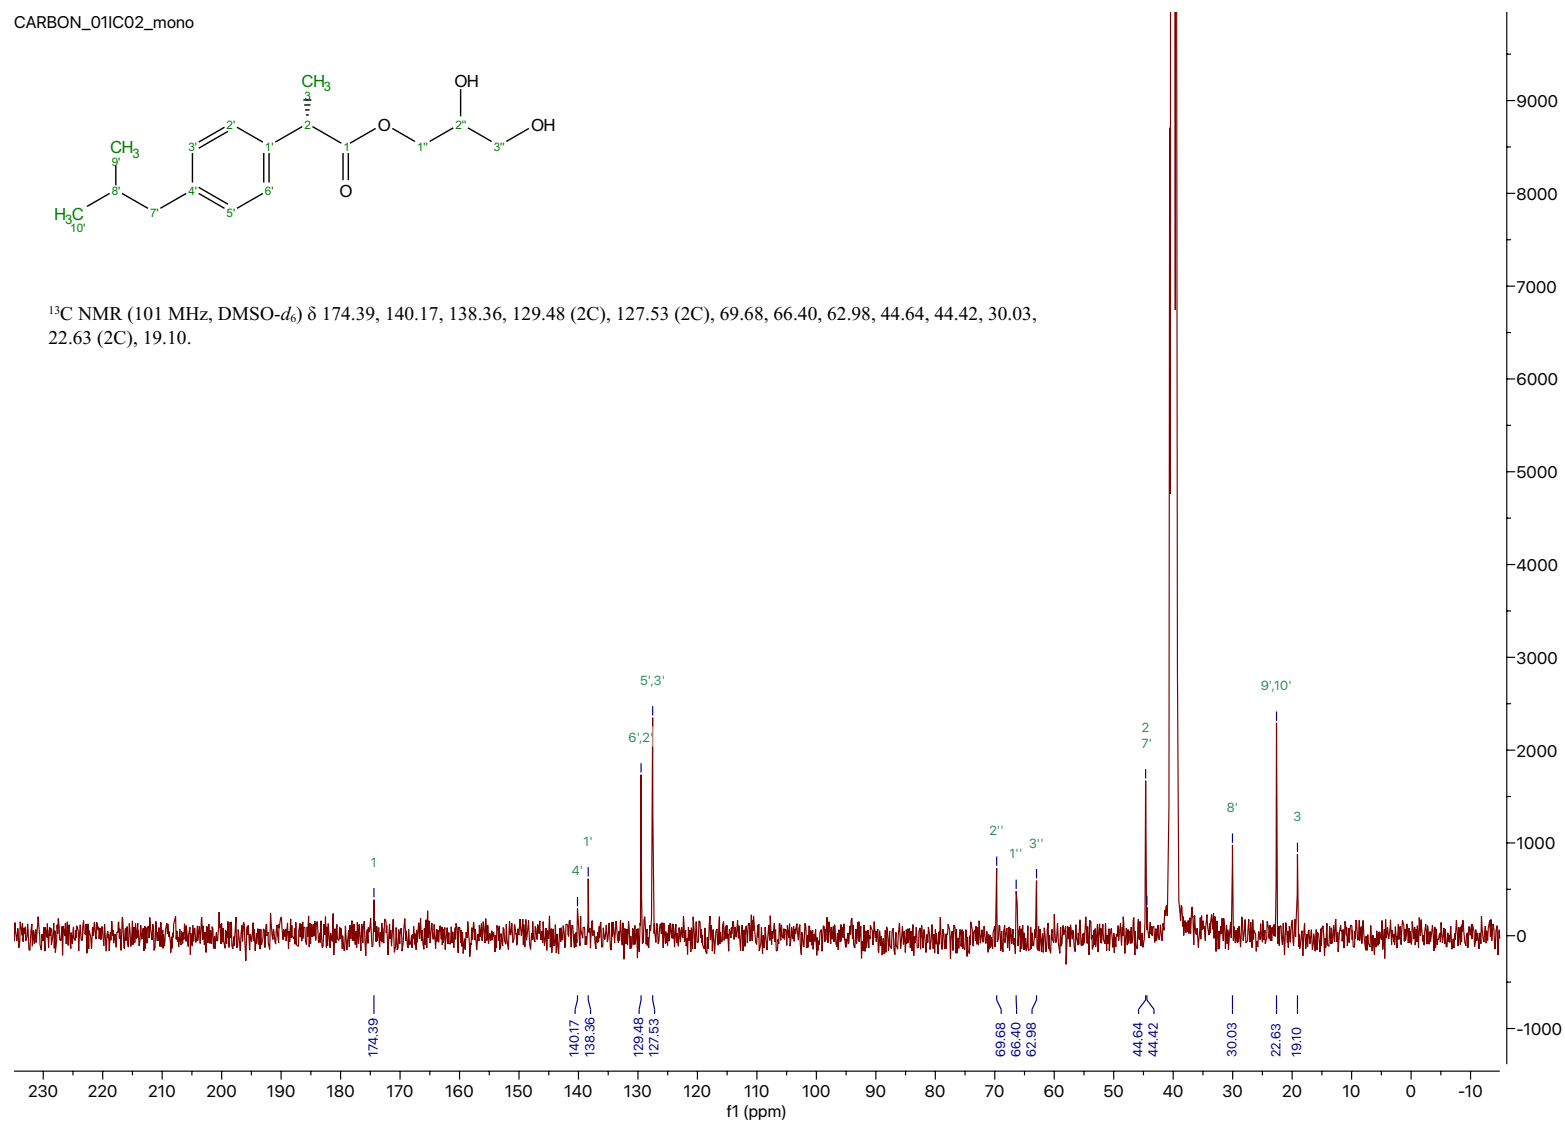

**Figure S10:** <sup>13</sup>C-NMR of glycerol ester of ibuprofen (6a/6b).

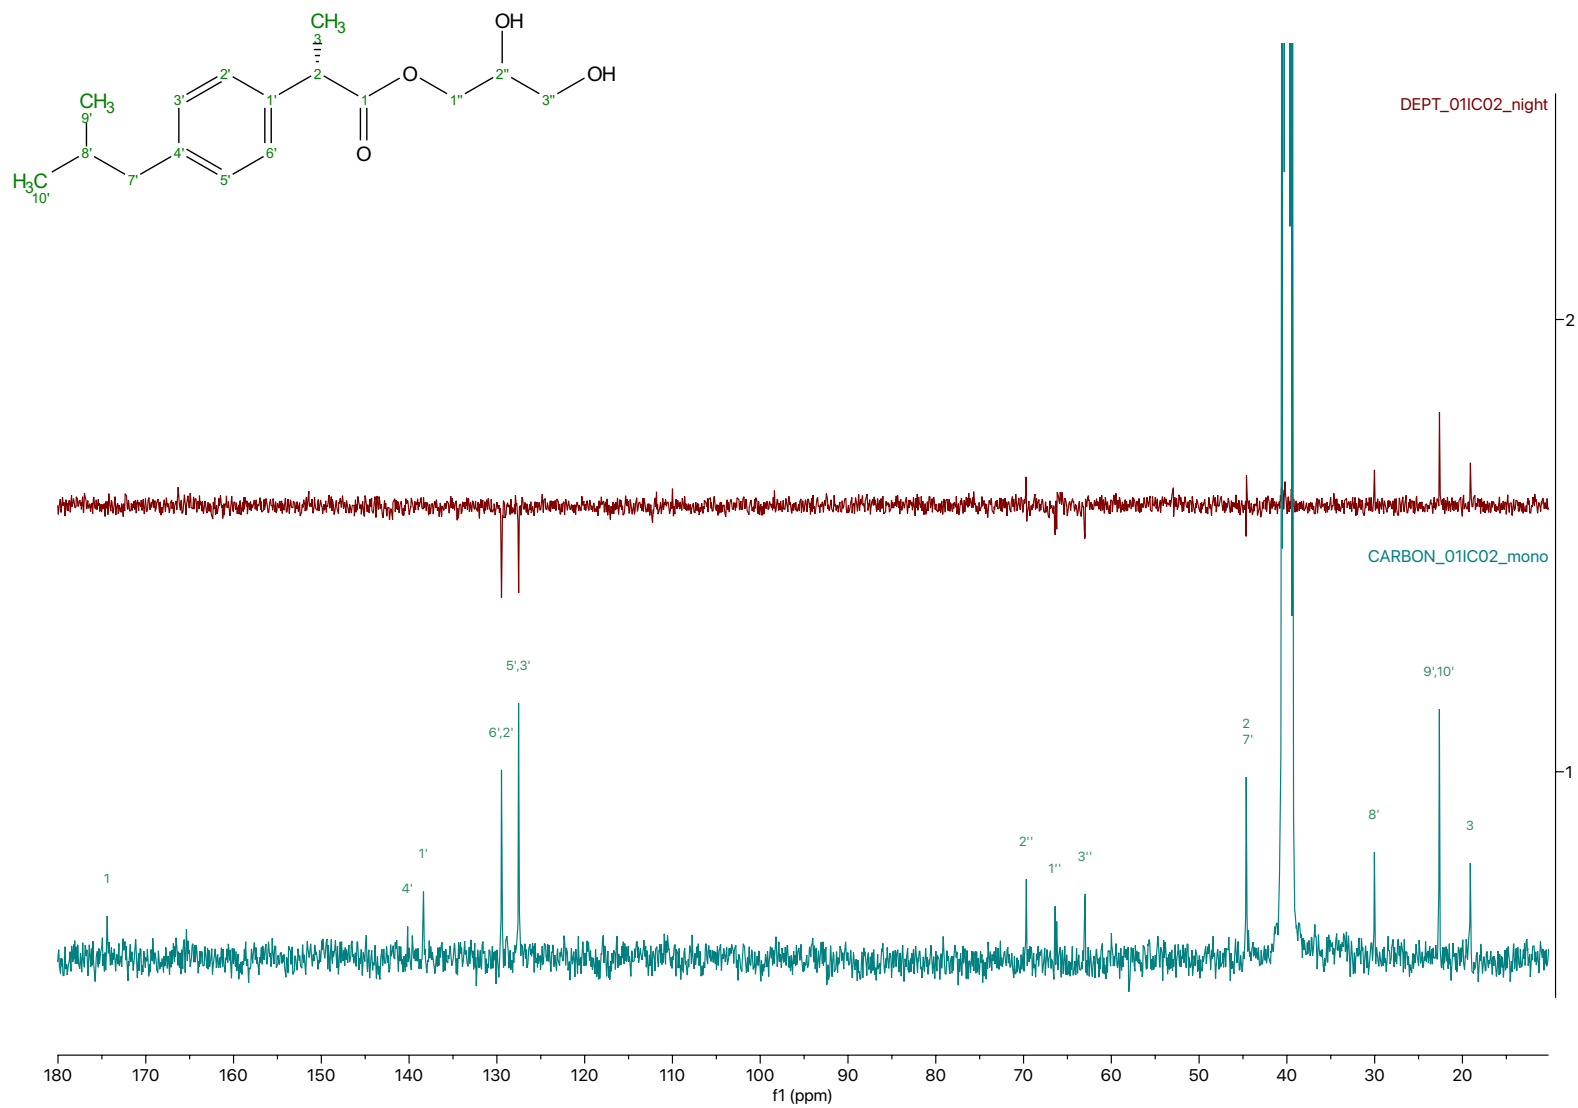

**Figure S11:** DEPT-NMR of glycerol ester of ibuprofen (**6a/6b**).



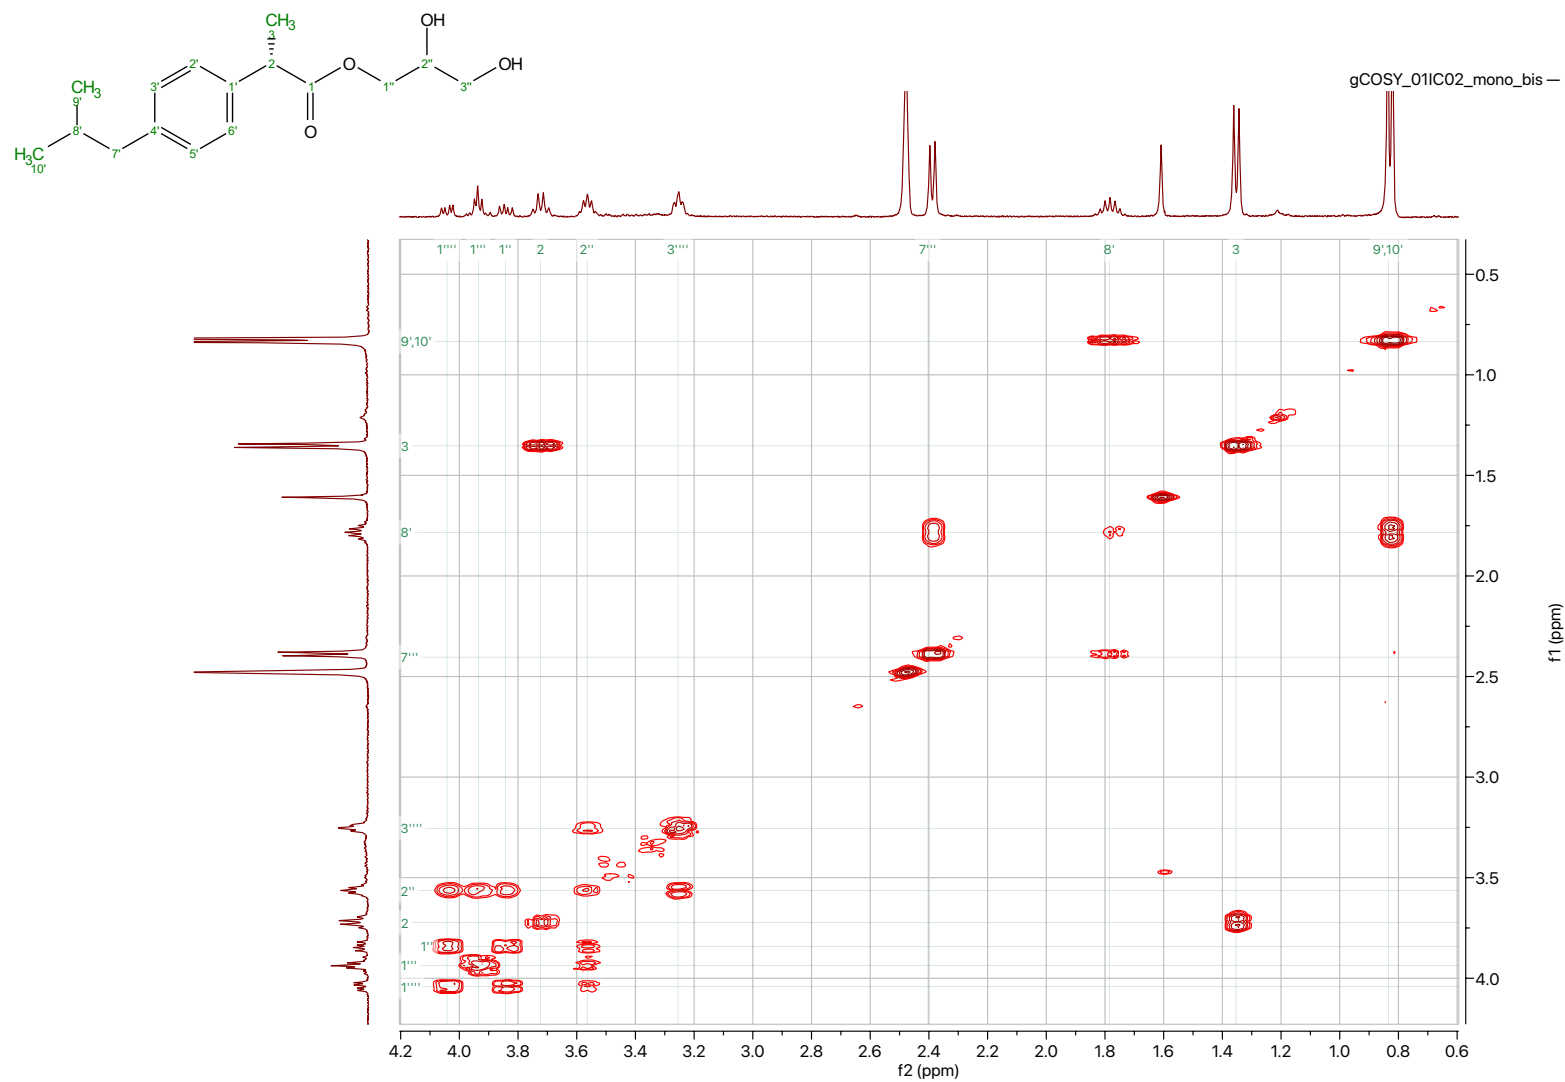

**Figure S13:** Zoom of the COSY-NMR of glycerol ester of ibuprofen (6a/6b).

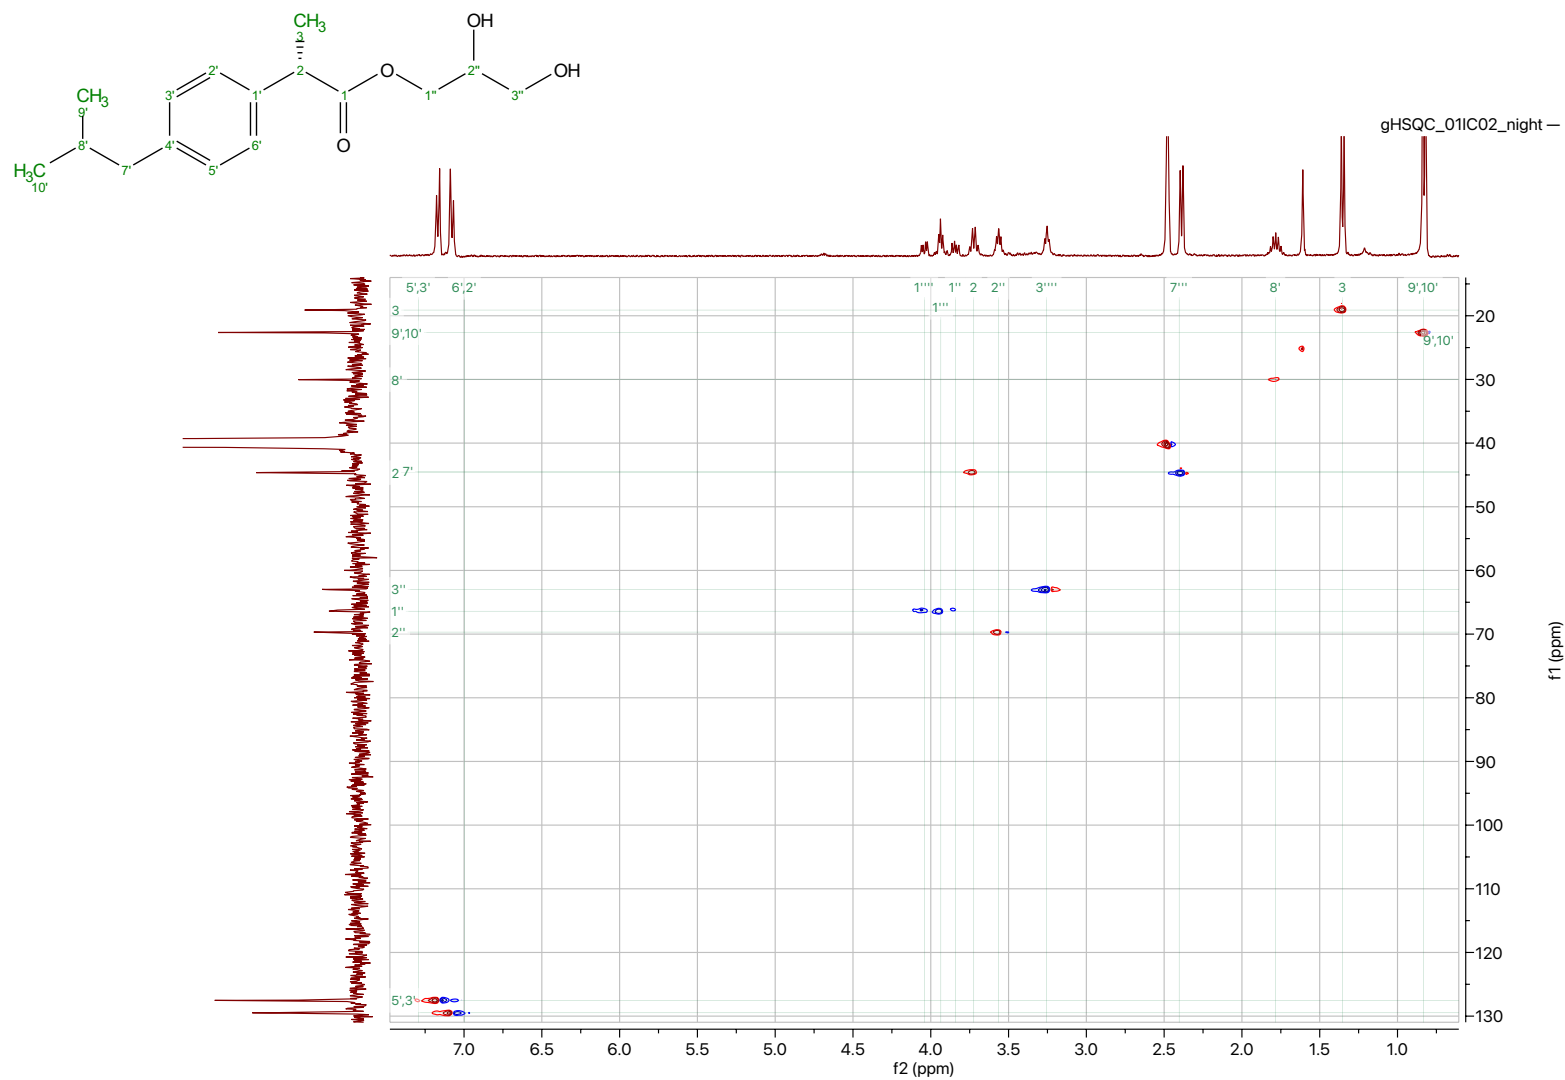

**Figure S14:** HSQC-NMR of glycerol ester of ibuprofen (**6a/6b**).

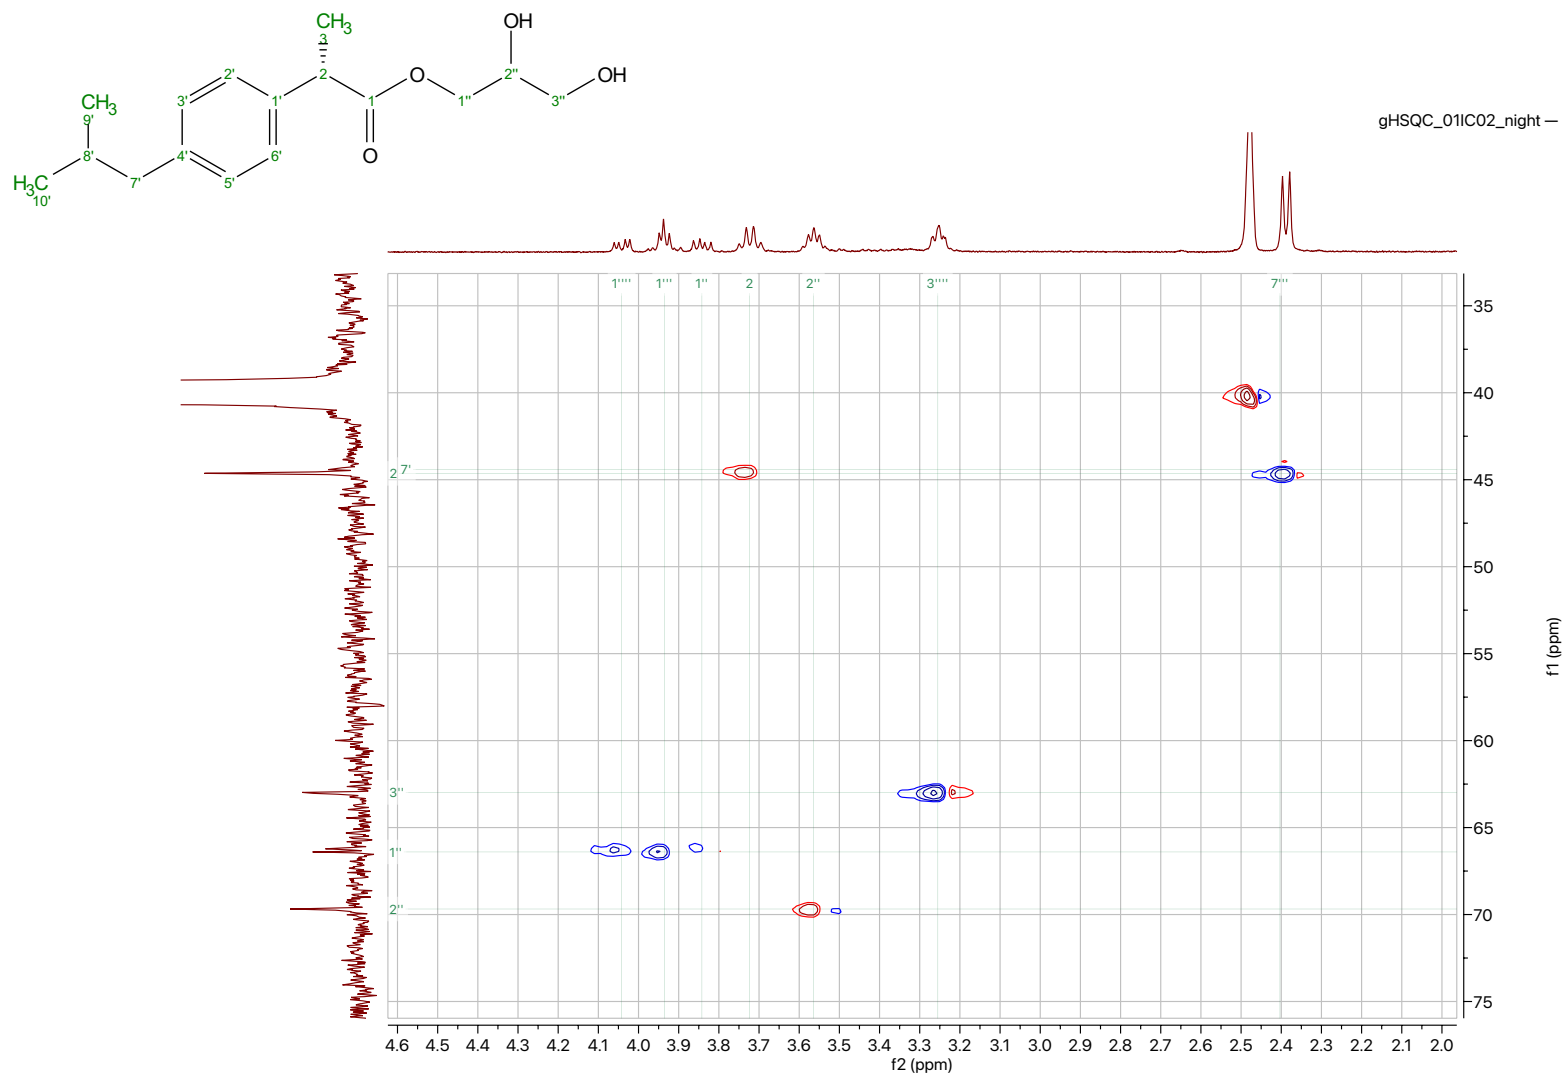

**Figure S15:** Zoom of the HSQC-NMR of glycerol ester of ibuprofen (**6a/6b**).



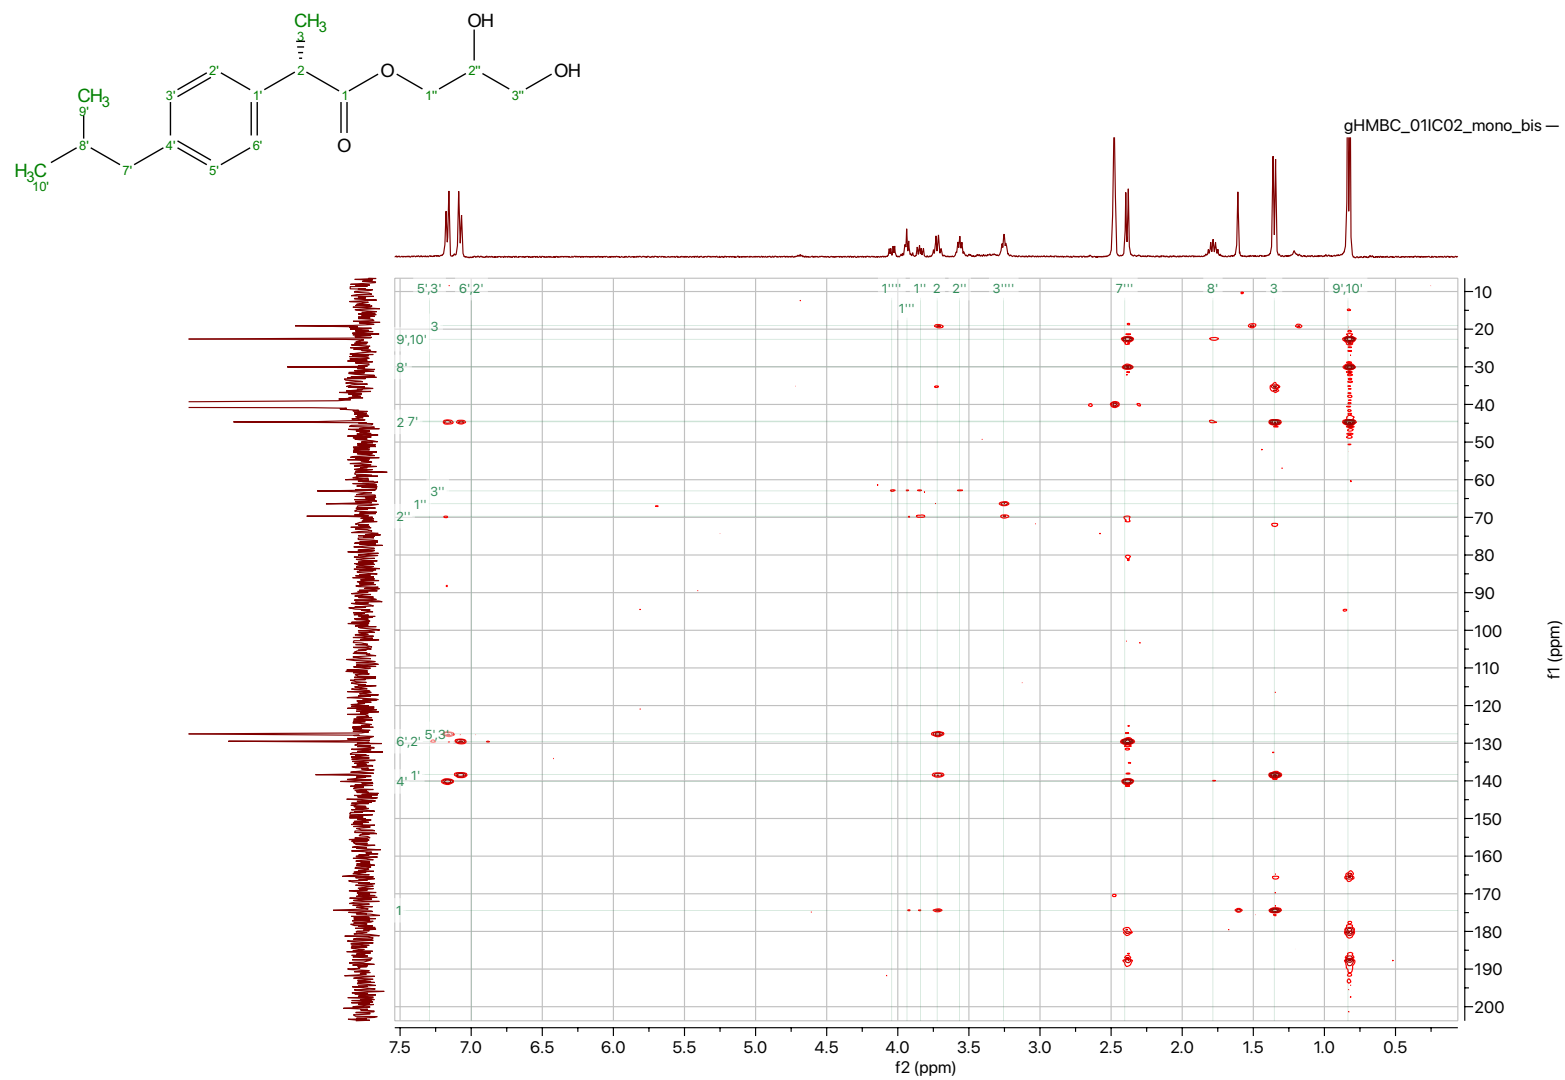

**Figure S16:** HMBC-NMR of glycerol ester of ibuprofen (**6a/6b**).

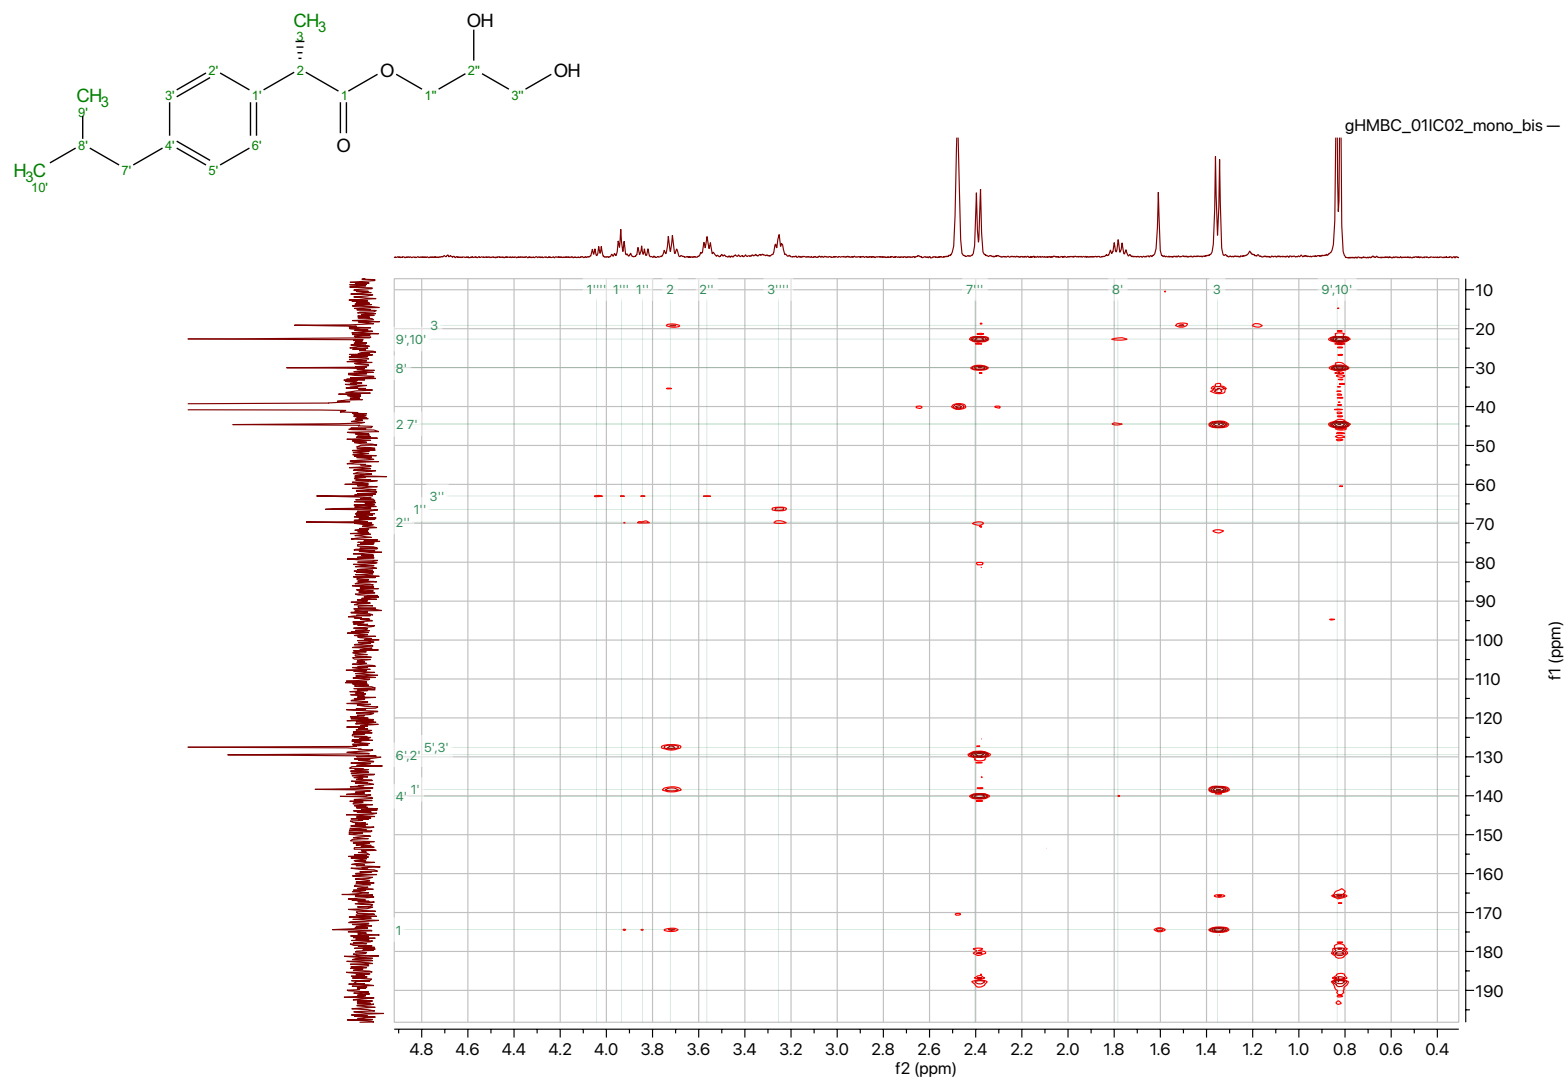

**Figure S17:** Zoom of the HMBC-NMR of glycerol ester of ibuprofen (**6a/6b**).

FZ68\_Rf04\_D2O\_2-1H —

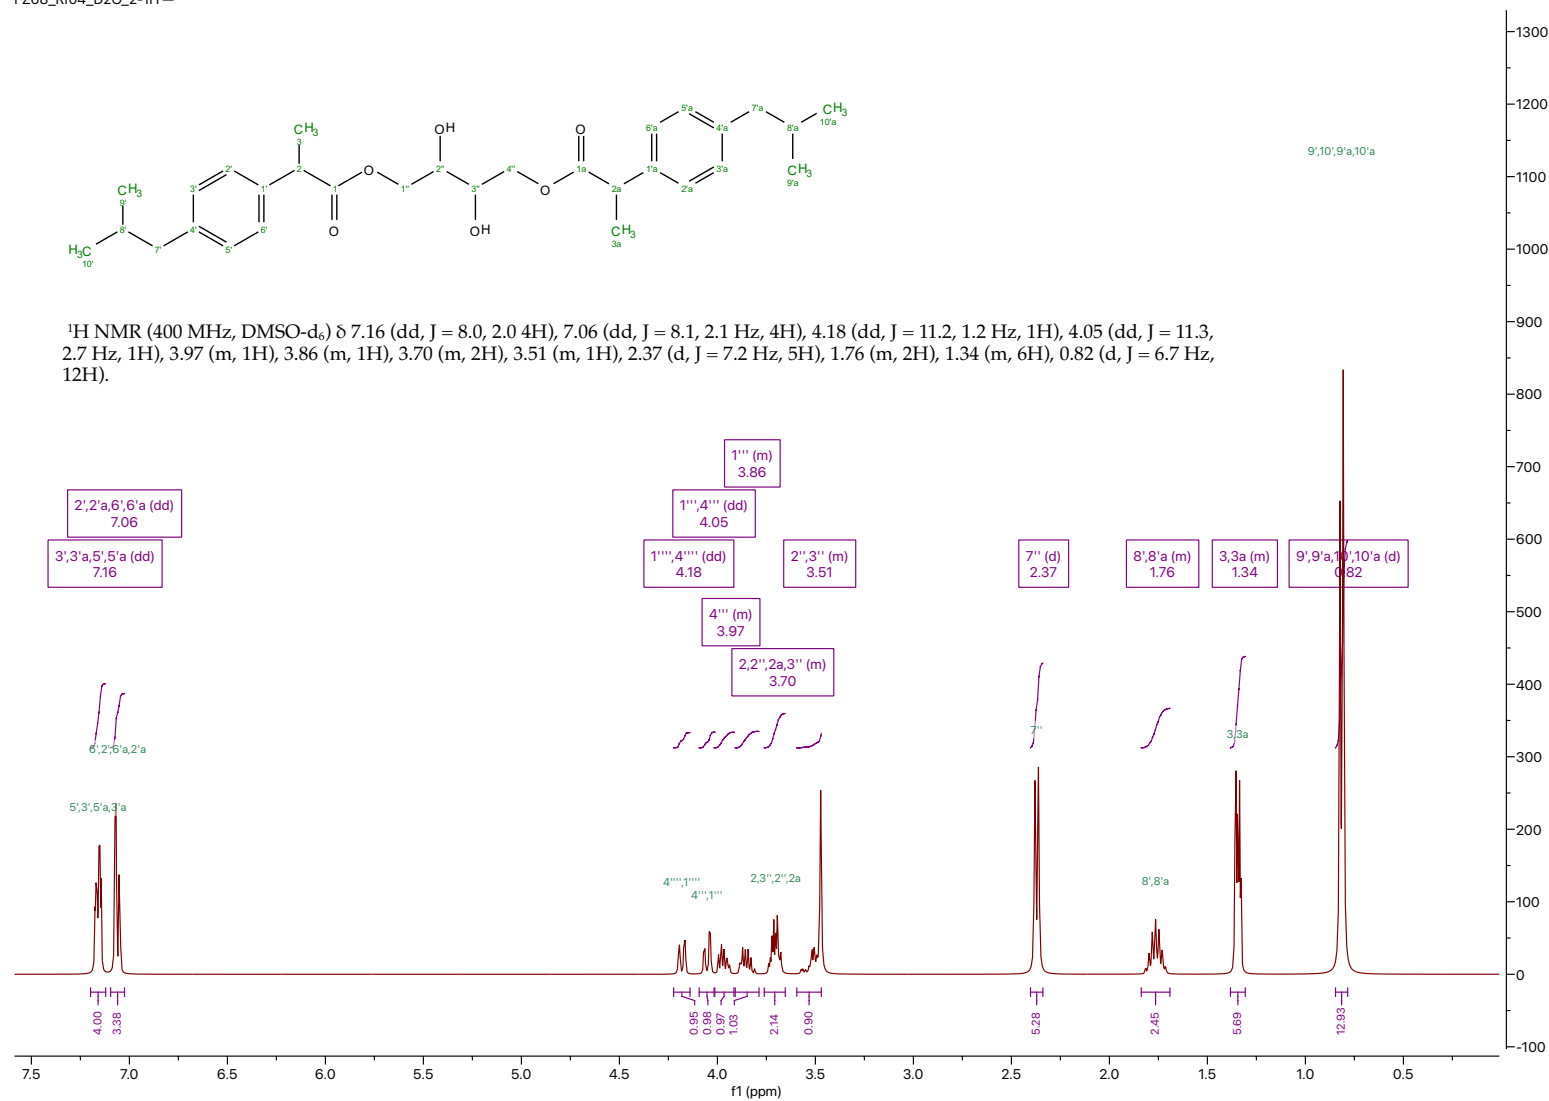

**Figure S18:** <sup>1</sup>H-NMR of the diacylated erythritol ester of ibuprofen (**4**).

CARBON\_01

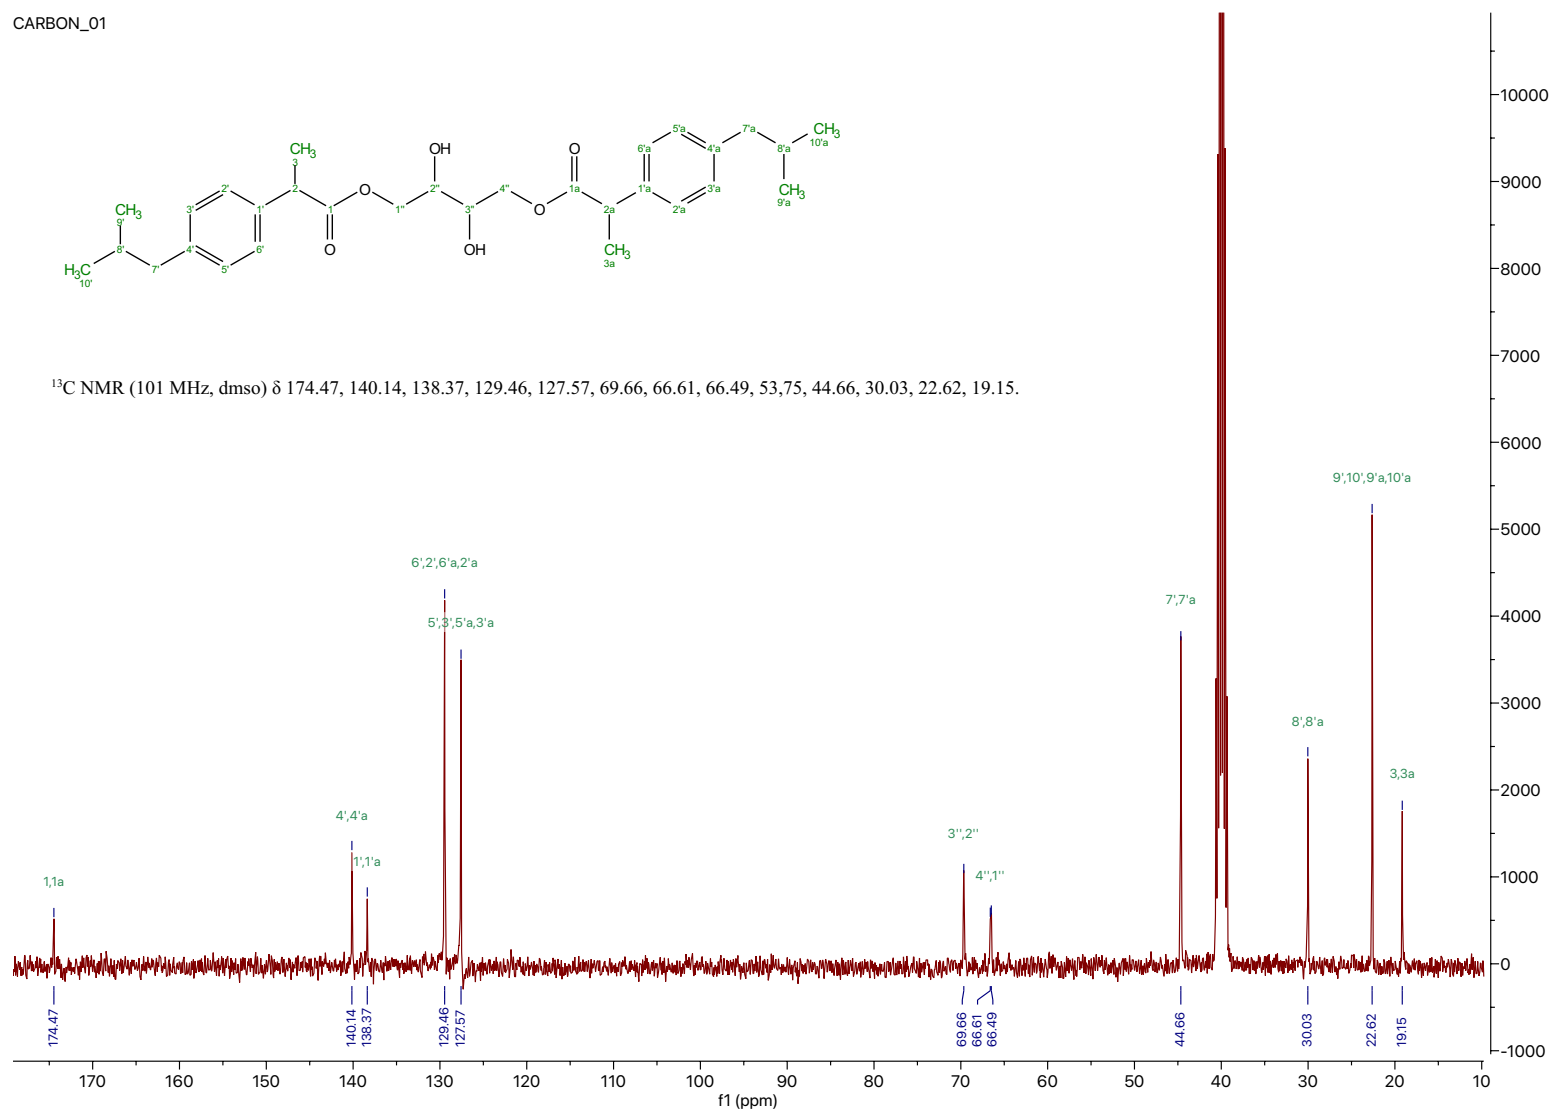

**Figure S19:** <sup>13</sup>C-NMR of the diacylated erythritol ester of ibuprofen (**4**).

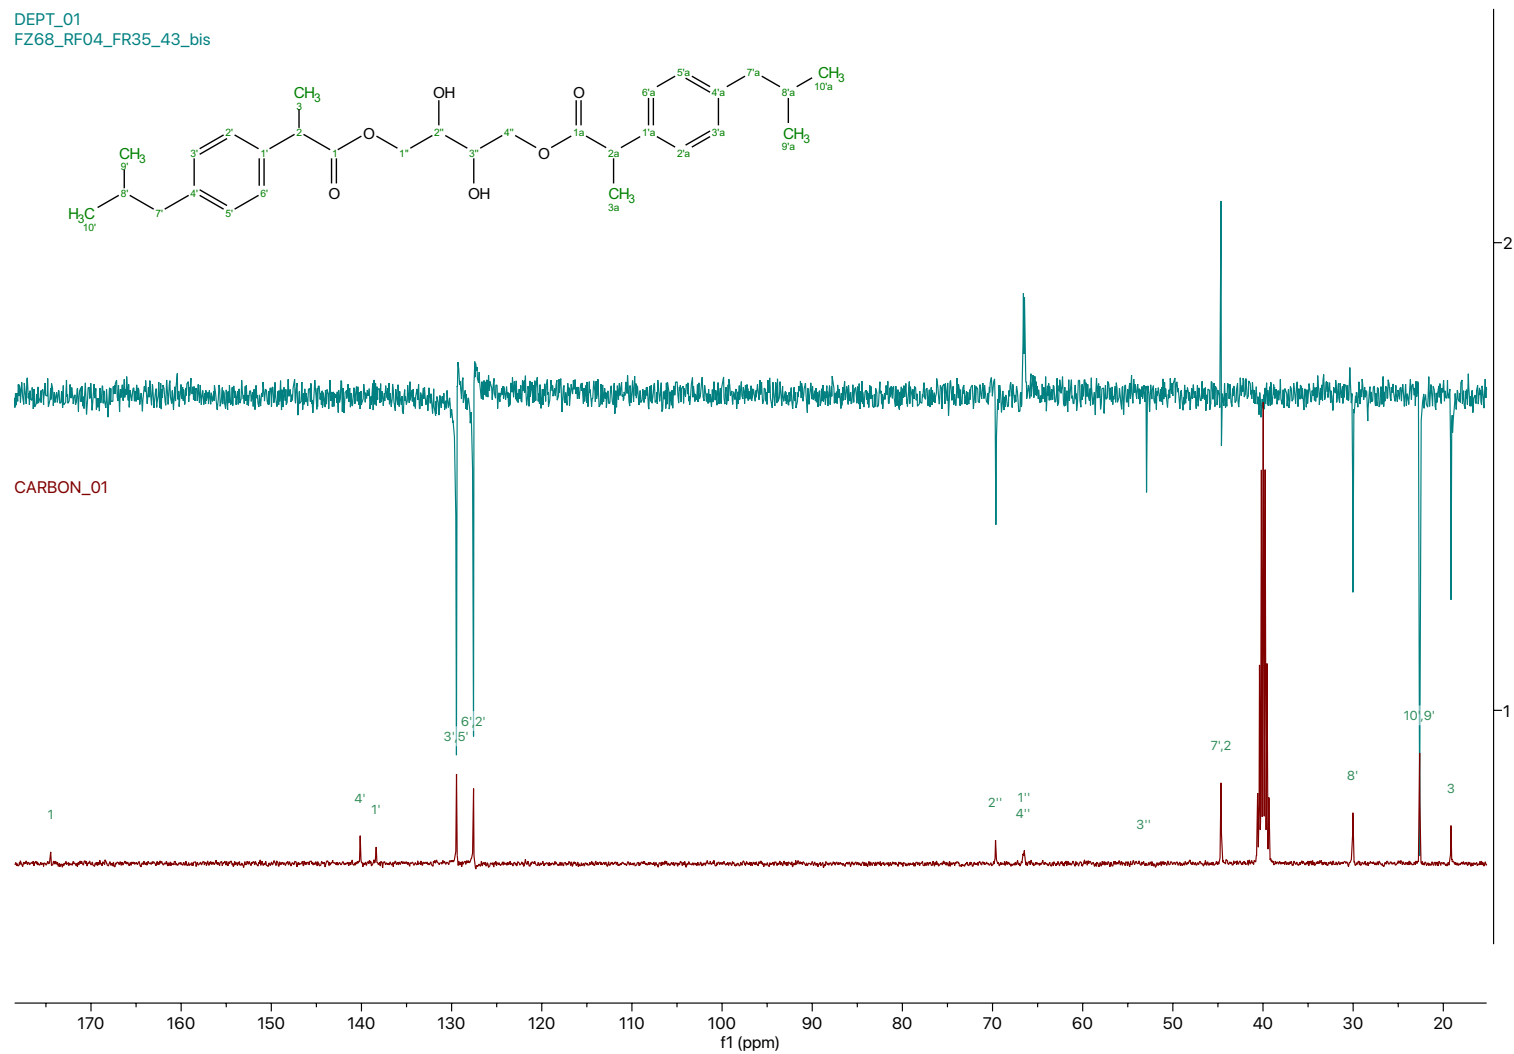

**Figure S20:** DEPT-NMR of the diacylated erythritol ester of ibuprofen (**4**).

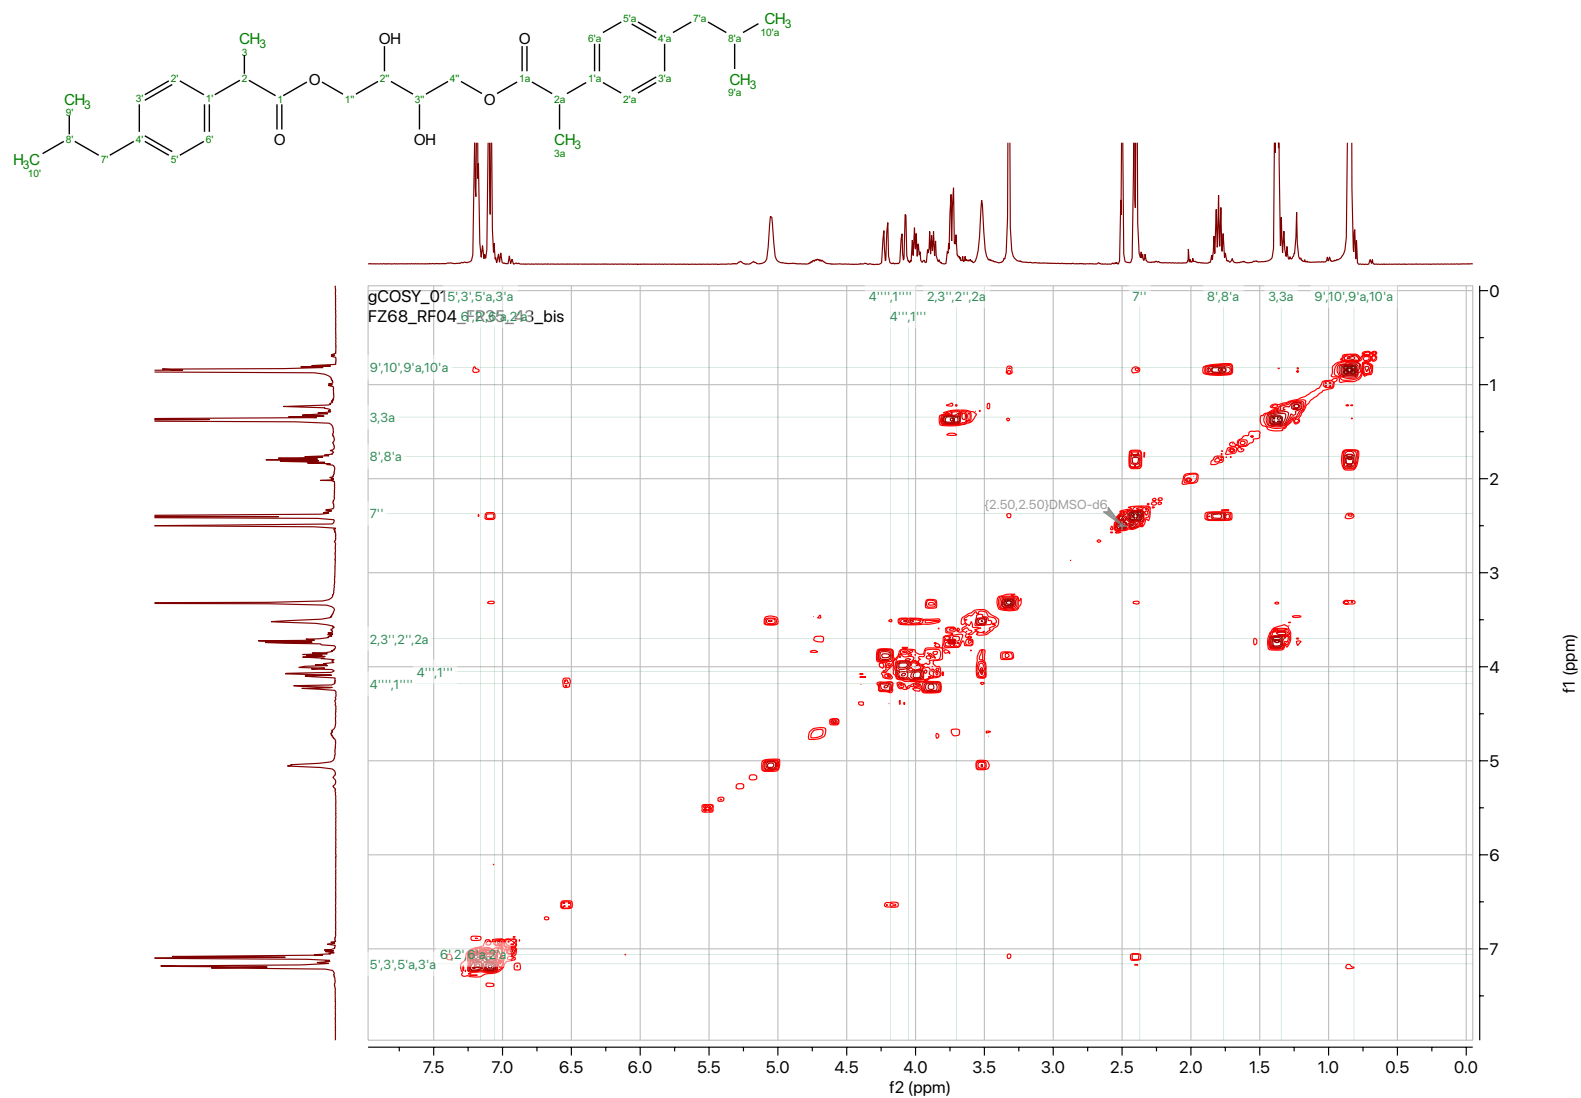

**Figure S21:** COSY-NMR of the diacylated erythritol ester of ibuprofen (4).

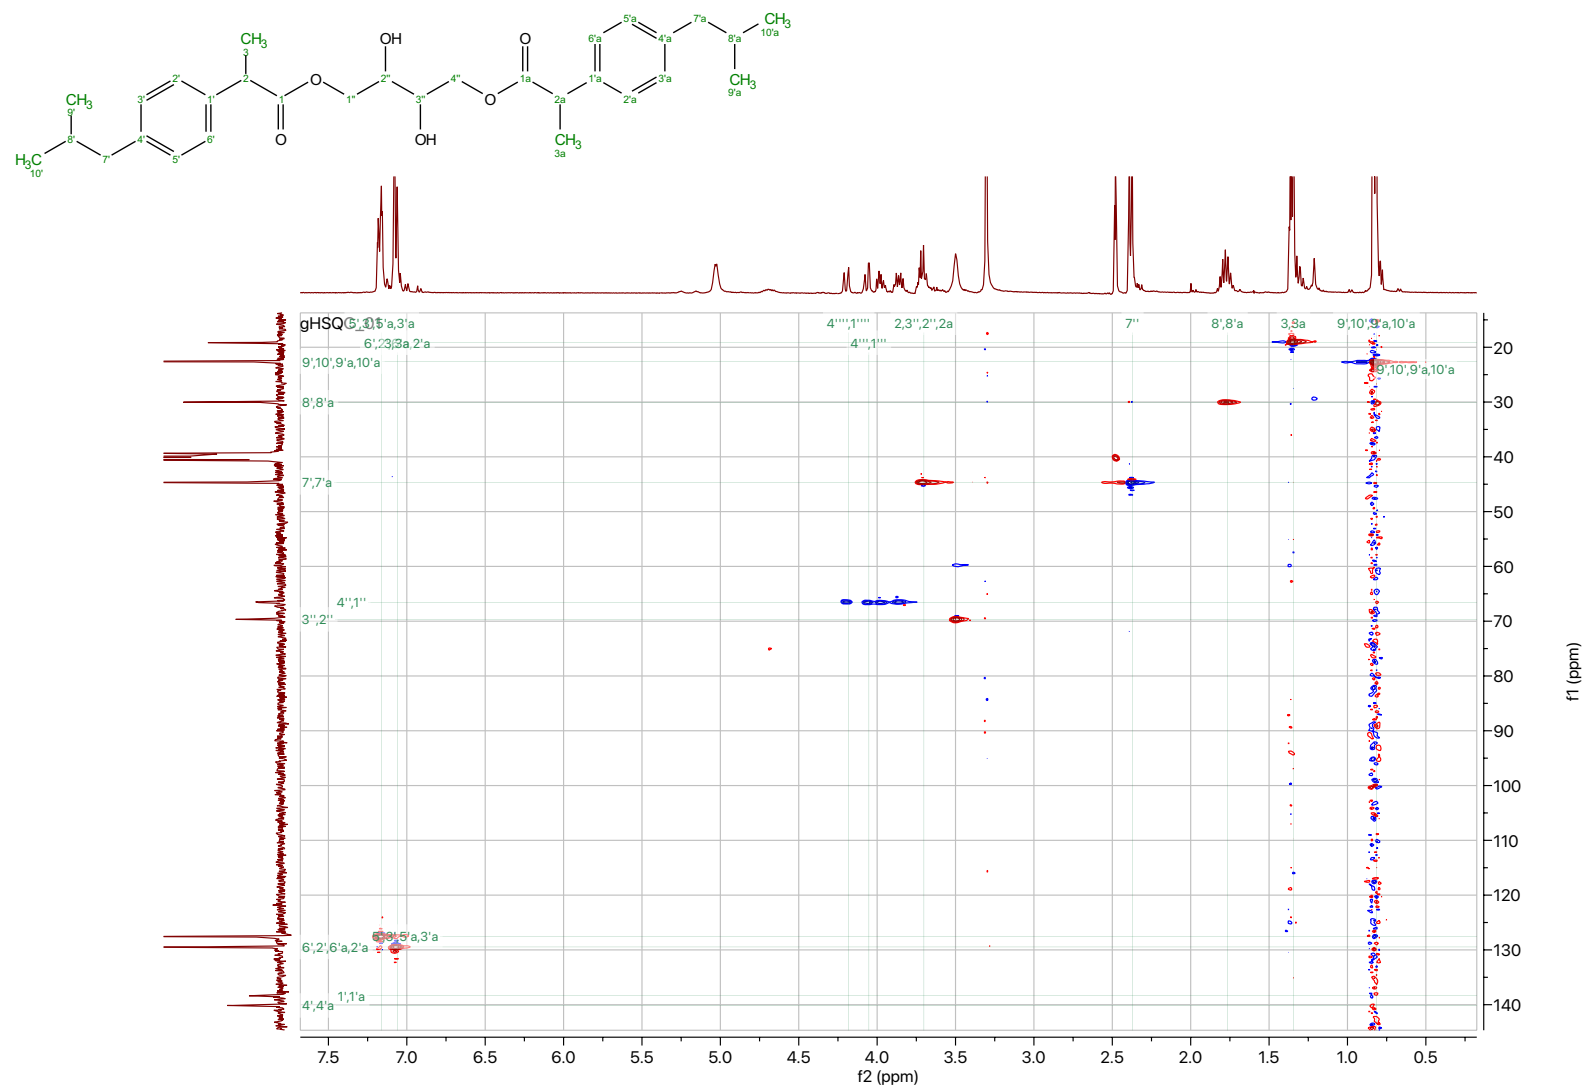

**Figure S22:** HSQC-NMR of the diacylated erythritol ester of ibuprofen (4).

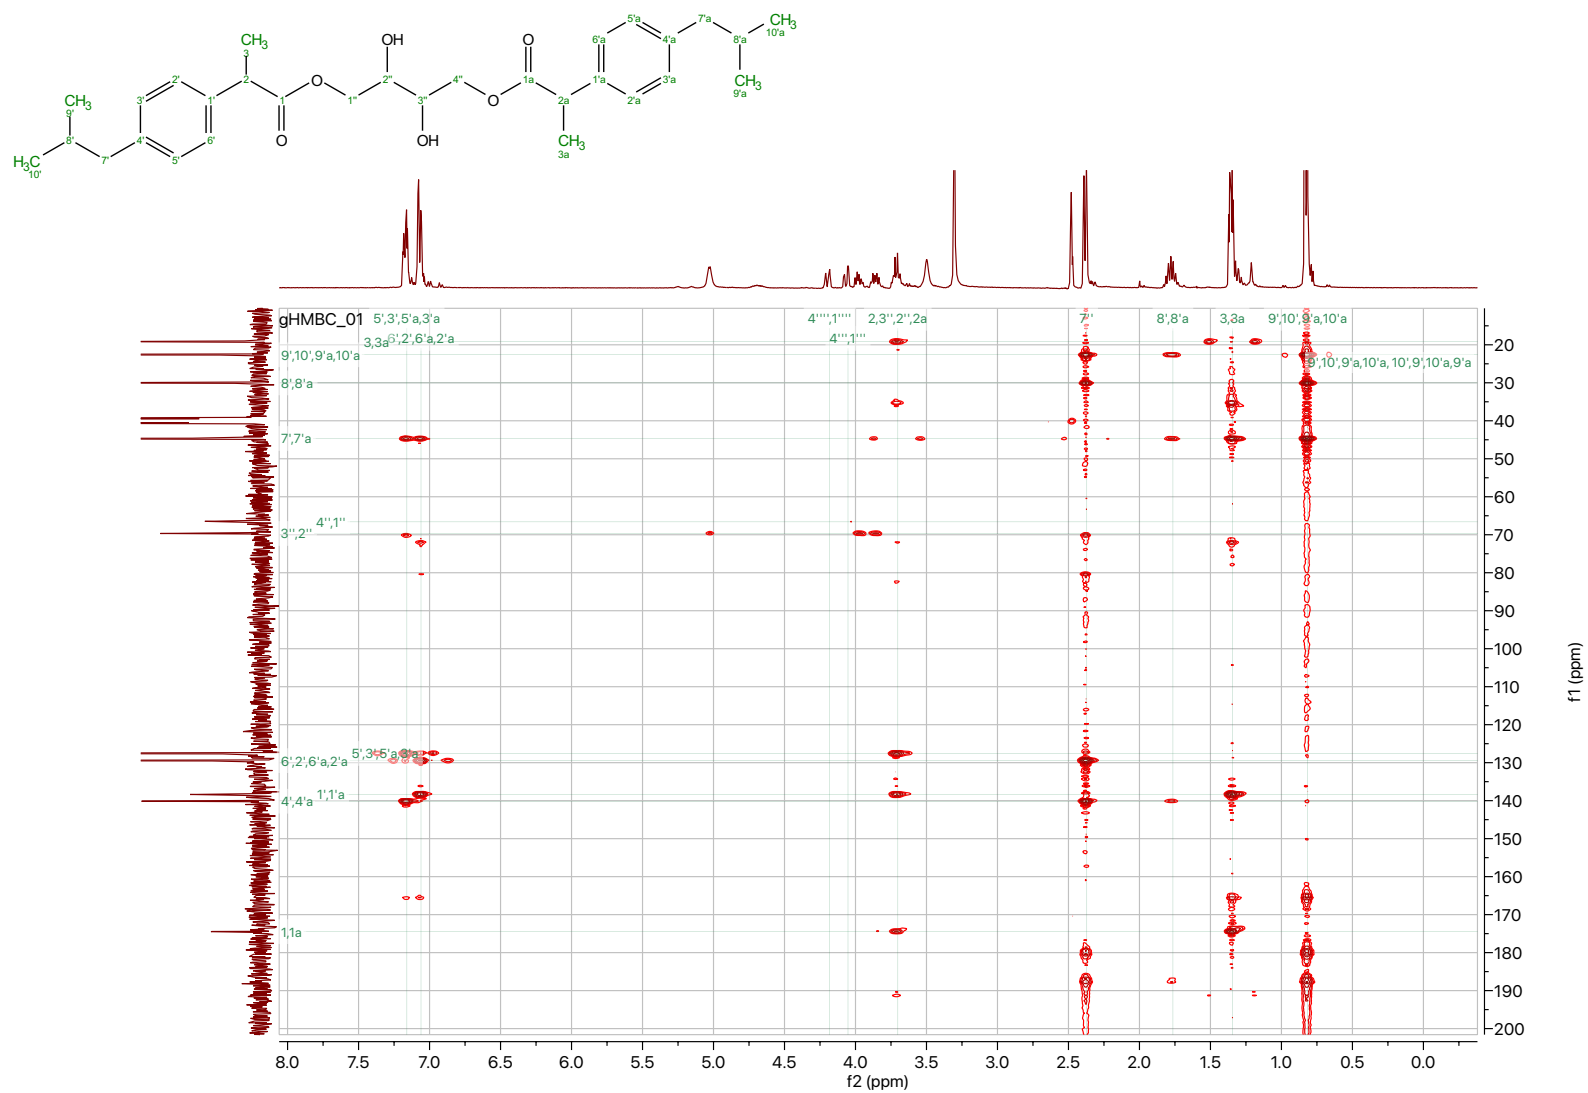

**Figure S23:** HMBC-NMR of the diacylated erythritol ester of ibuprofen (4).



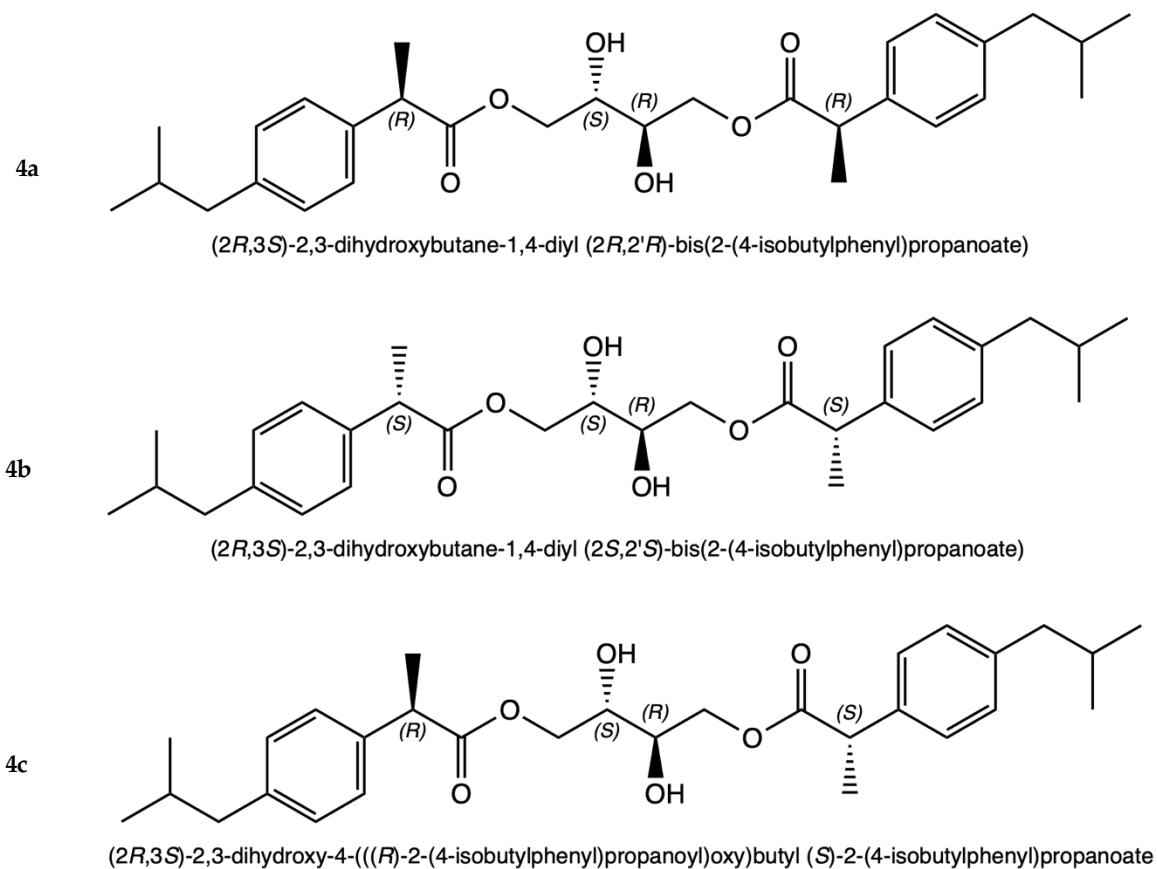

**Figure S24:** Representation of the three possible configurations of product **4** (**4a**, **4b**, and **4c**).
